# Supplementary material for: In situ Rb–Sr dating by collision cell, multicollection inductively-coupled plasma mass-spectrometry with pre-cell mass-filter, (CC-MC-ICPMS/MS)
Source: Royal Society of Chemistry journal article supplement (doi:10.1039/d1ja00006c), 2021-01-01
Supplement: d1ja00006c1.pdf [file d1ja00006c1.pdf]

Table S1: Data plotted in Figure 3

| NST SRM987 - Rb-doped 987 |          |          |           |   |
|---------------------------|----------|----------|-----------|---|
| Rb/Sr                     | #Sr/#Sr  | 2SE      | Δ #Sr/#Sr | n |
| 0.01                      | 0.710256 | 0.000007 | 0.000005  | 5 |
| 0.1                       | 0.710256 | 0.000009 | 0.000005  | 5 |
| 1                         | 0.710241 | 0.000017 | -0.000010 | 5 |
| 10                        | 0.710252 | 0.000009 | 0.000001  | 5 |
| 100                       | 0.710257 | 0.000025 | 0.000006  | 5 |

Table S2: Data plotted in Figure 5

| Instrument | Pre-cell quadrupole | Sample     | #Sr/#Sr | 2SE     | Δ #Sr/#Sr | #Sr/#Sr standard | Spot size μm | Repetition rate (Hz) | Fluence (J/cm²) | Pulse count |
|------------|---------------------|------------|---------|---------|-----------|------------------|--------------|----------------------|-----------------|-------------|
| Proteus    | No bandpass         | NST SRM610 | 0.651   | 0.001   | -0.059    | Te-1             | 110          | 10                   | 6               | 600         |
| Proteus    | No bandpass         | NST SRM610 | 0.653   | 0.001   | -0.056    | Te-1             | 110          | 10                   | 6               | 600         |
| Proteus    | No bandpass         | NST SRM610 | 0.650   | 0.001   | -0.059    | Te-1             | 110          | 10                   | 6               | 600         |
| Proteus    | No bandpass         | NST SRM610 | 0.651   | 0.002   | -0.059    | Te-1             | 110          | 10                   | 6               | 600         |
| Proteus    | No bandpass         | NST SRM610 | 0.650   | 0.003   | -0.059    | Te-1             | 110          | 10                   | 6               | 600         |
| Proteus    | Bandpass mode       | NST SRM610 | 0.70971 | 0.00007 | 0.00002   | Te-1             | 110          | 10                   | 6               | 600         |
| Proteus    | Bandpass mode       | NST SRM610 | 0.70965 | 0.00007 | -0.00005  | Te-1             | 110          | 10                   | 6               | 600         |
| Proteus    | Bandpass mode       | NST SRM610 | 0.70965 | 0.00008 | -0.00005  | Te-1             | 110          | 10                   | 6               | 600         |
| Proteus    | Bandpass mode       | NST SRM610 | 0.70968 | 0.00008 | -0.00002  | Te-1             | 110          | 10                   | 6               | 600         |
| Proteus    | Bandpass mode       | NST SRM610 | 0.70964 | 0.00007 | -0.00006  | Te-1             | 110          | 10                   | 6               | 600         |
| Proteus    | Bandpass mode       | NST SRM610 | 0.70963 | 0.00008 | -0.00007  | Te-1             | 110          | 10                   | 6               | 600         |
| Proteus    | Bandpass mode       | NST SRM610 | 0.70971 | 0.00007 | 0.00001   | Te-1             | 110          | 10                   | 6               | 600         |
| Proteus    | Bandpass mode       | NST SRM610 | 0.70968 | 0.00006 | -0.00001  | Te-1             | 110          | 10                   | 6               | 600         |
| Proteus    | Bandpass mode       | NST SRM610 | 0.70968 | 0.00007 | -0.00002  | Te-1             | 110          | 10                   | 6               | 600         |
| Proteus    | Bandpass mode       | NST SRM610 | 0.70973 | 0.00008 | 0.00003   | Te-1             | 110          | 10                   | 6               | 600         |
| Proteus    | Bandpass mode       | NST SRM610 | 0.70970 | 0.00007 | 0.00000   | Te-1             | 110          | 10                   | 6               | 600         |
| Proteus    | No bandpass         | BHVO2G     | 0.663   | 0.008   | -0.040    | Te-1             | 110          | 10                   | 6               | 600         |
| Proteus    | No bandpass         | BHVO2G     | 0.670   | 0.004   | -0.033    | Te-1             | 110          | 10                   | 6               | 600         |
| Proteus    | No bandpass         | BHVO2G     | 0.653   | 0.011   | -0.051    | Te-1             | 110          | 10                   | 6               | 600         |
| Proteus    | No bandpass         | BHVO2G     | 0.665   | 0.007   | -0.039    | Te-1             | 110          | 10                   | 6               | 600         |
| Proteus    | No bandpass         | BHVO2G     | 0.657   | 0.009   | -0.047    | Te-1             | 110          | 10                   | 6               | 600         |
| Proteus    | Bandpass mode       | BHVO2G     | 0.70340 | 0.00012 | -0.00007  | Te-1             | 110          | 10                   | 6               | 600         |
| Proteus    | Bandpass mode       | BHVO2G     | 0.70341 | 0.00012 | -0.00006  | Te-1             | 110          | 10                   | 6               | 600         |
| Proteus    | Bandpass mode       | BHVO2G     | 0.70356 | 0.00012 | 0.00009   | Te-1             | 110          | 10                   | 6               | 600         |
| Proteus    | Bandpass mode       | BHVO2G     | 0.70345 | 0.00011 | -0.00002  | Te-1             | 110          | 10                   | 6               | 600         |
| Proteus    | Bandpass mode       | BHVO2G     | 0.70348 | 0.00015 | 0.00002   | Te-1             | 110          | 10                   | 6               | 600         |
| Proteus    | Bandpass mode       | BHVO2G     | 0.70340 | 0.00014 | -0.00007  | Te-1             | 110          | 10                   | 6               | 600         |
| Proteus    | Bandpass mode       | BHVO2G     | 0.70348 | 0.00012 | 0.00002   | Te-1             | 110          | 10                   | 6               | 600         |
| Proteus    | Bandpass mode       | BHVO2G     | 0.70347 | 0.00010 | 0.00000   | Te-1             | 110          | 10                   | 6               | 600         |
| Proteus    | Bandpass mode       | BHVO2G     | 0.70344 | 0.00012 | -0.00003  | Te-1             | 110          | 10                   | 6               | 600         |
| Proteus    | Bandpass mode       | BHVO2G     | 0.70356 | 0.00013 | 0.00009   | Te-1             | 110          | 10                   | 6               | 600         |
| Proteus    | Bandpass mode       | BHVO2G     | 0.70352 | 0.00012 | 0.00005   | Te-1             | 110          | 10                   | 6               | 600         |
| Proteus    | No bandpass         | BCR2G      | 0.671   | 0.022   | -0.034    | Te-1             | 110          | 10                   | 6               | 600         |
| Proteus    | No bandpass         | BCR2G      | 0.662   | 0.004   | -0.043    | Te-1             | 110          | 10                   | 6               | 600         |
| Proteus    | No bandpass         | BCR2G      | 0.669   | 0.006   | -0.036    | Te-1             | 110          | 10                   | 6               | 600         |
| Proteus    | No bandpass         | BCR2G      | 0.658   | 0.013   | -0.047    | Te-1             | 110          | 10                   | 6               | 600         |
| Proteus    | No bandpass         | BCR2G      | 0.668   | 0.004   | -0.037    | Te-1             | 110          | 10                   | 6               | 600         |
| Proteus    | Bandpass mode       | BCR2G      | 0.70493 | 0.00010 | -0.00007  | Te-1             | 110          | 10                   | 6               | 600         |
| Proteus    | Bandpass mode       | BCR2G      | 0.70499 | 0.00012 | -0.00001  | Te-1             | 110          | 10                   | 6               | 600         |
| Proteus    | Bandpass mode       | BCR2G      | 0.70512 | 0.00014 | 0.00012   | Te-1             | 110          | 10                   | 6               | 600         |
| Proteus    | Bandpass mode       | BCR2G      | 0.70510 | 0.00009 | 0.00010   | Te-1             | 110          | 10                   | 6               | 600         |
| Proteus    | Bandpass mode       | BCR2G      | 0.70507 | 0.00012 | 0.00007   | Te-1             | 110          | 10                   | 6               | 600         |
| Proteus    | Bandpass mode       | BCR2G      | 0.70505 | 0.00014 | 0.00005   | Te-1             | 110          | 10                   | 6               | 600         |
| Proteus    | Bandpass mode       | BCR2G      | 0.70494 | 0.00014 | -0.00006  | Te-1             | 110          | 10                   | 6               | 600         |
| Proteus    | Bandpass mode       | BCR2G      | 0.70501 | 0.00011 | 0.00001   | Te-1             | 110          | 10                   | 6               | 600         |
| Proteus    | Bandpass mode       | BCR2G      | 0.70494 | 0.00012 | -0.00006  | Te-1             | 110          | 10                   | 6               | 600         |
| Proteus    | Bandpass mode       | BCR2G      | 0.70508 | 0.00014 | 0.00008   | Te-1             | 110          | 10                   | 6               | 600         |
| Proteus    | Bandpass mode       | BCR2G      | 0.70505 | 0.00013 | 0.00005   | Te-1             | 110          | 10                   | 6               | 600         |
| Proteus    | No bandpass         | BIR-G      | 0.637   | 0.014   | -0.066    | Te-1             | 110          | 10                   | 6               | 600         |
| Proteus    | No bandpass         | BIR-G      | 0.651   | 0.008   | -0.052    | Te-1             | 110          | 10                   | 6               | 600         |
| Proteus    | No bandpass         | BIR-G      | 0.640   | 0.014   | -0.063    | Te-1             | 110          | 10                   | 6               | 600         |
| Proteus    | No bandpass         | BIR-G      | 0.625   | 0.021   | -0.078    | Te-1             | 110          | 10                   | 6               | 600         |
| Proteus    | No bandpass         | BIR-G      | 0.620   | 0.020   | -0.083    | Te-1             | 110          | 10                   | 6               | 600         |
| Proteus    | Bandpass mode       | BIR-G      | 0.7030  | 0.0004  | -0.0001   | Te-1             | 110          | 10                   | 6               | 600         |
| Proteus    | Bandpass mode       | BIR-G      | 0.7031  | 0.0004  | 0.0000    | Te-1             | 110          | 10                   | 6               | 600         |
| Proteus    | Bandpass mode       | BIR-G      | 0.7029  | 0.0003  | -0.0002   | Te-1             | 110          | 10                   | 6               | 600         |
| Proteus    | Bandpass mode       | BIR-G      | 0.7031  | 0.0004  | -0.0001   | Te-1             | 110          | 10                   | 6               | 600         |
| Proteus    | Bandpass mode       | BIR-G      | 0.7032  | 0.0004  | 0.0001    | Te-1             | 110          | 10                   | 6               | 600         |
| Proteus    | Bandpass mode       | BIR-G      | 0.7033  | 0.0004  | 0.0002    | Te-1             | 110          | 10                   | 6               | 600         |
| Proteus    | Bandpass mode       | BIR-G      | 0.7033  | 0.0003  | 0.0002    | Te-1             | 110          | 10                   | 6               | 600         |
| Proteus    | Bandpass mode       | BIR-G      | 0.7031  | 0.0003  | 0.0000    | Te-1             | 110          | 10                   | 6               | 600         |
| Proteus    | Bandpass mode       | BIR-G      | 0.7029  | 0.0003  | -0.0002   | Te-1             | 110          | 10                   | 6               | 600         |
| Proteus    | Bandpass mode       | BIR-G      | 0.7027  | 0.0004  | -0.0004   | Te-1             | 110          | 10                   | 6               | 600         |
| Proteus    | Bandpass mode       | BIR-G      | 0.7032  | 0.0004  | 0.0001    | Te-1             | 110          | 10                   | 6               | 600         |

Table S3: Data plotted in Figure 6

| Sample: DG1 |           |                  |          |         |         |         |                  |                                                      |                  |                      |                 |             |                  |                    |
|-------------|-----------|------------------|----------|---------|---------|---------|------------------|------------------------------------------------------|------------------|----------------------|-----------------|-------------|------------------|--------------------|
| Instrument  | Dataset   | Analysis Session | #Rb/#Sr  | 2SE     | #Sr/#Sr | 2SE     | #Sr/#Sr standard | <sup>87</sup> Rb/ <sup>87</sup> Sr correction factor | Spot diameter μm | Repetition rate (Hz) | Fluence (J/cm²) | Pulse count | Torch Depth (mm) | Sample gas (l/min) |
| Proteus     | Dataset 1 | Session 1        | 0.04647  | 0.00181 | 0.70909 | 0.00037 | Te-1             | 0.975                                                | 110              | 10                   | 6               | 1000        | 15               | 0.96               |
| Proteus     | Dataset 1 | Session 1        | 0.18930  | 0.26987 | 0.70935 | 0.00039 | Te-1             | 0.975                                                | 110              | 10                   | 6               | 1000        | 15               | 0.96               |
| Proteus     | Dataset 1 | Session 1        | 0.03941  | 0.00319 | 0.70950 | 0.00041 | Te-1             | 0.975                                                | 110              | 10                   | 6               | 1000        | 15               | 0.96               |
| Proteus     | Dataset 1 | Session 1        | 12.34330 | 0.58973 | 0.75551 | 0.00305 | Te-1             | 0.975                                                | 110              | 10                   | 6               | 1000        | 15               | 0.96               |
| Proteus     | Dataset 1 | Session 1        | 12.46032 | 0.27433 | 0.75965 | 0.00192 | Te-1             | 0.975                                                | 110              | 10                   | 6               | 1000        | 15               | 0.96               |
| Proteus     | Dataset 1 | Session 1        | 0.89432  | 0.17388 | 0.71373 | 0.00110 | Te-1             | 0.975                                                | 110              | 10                   | 6               | 1000        | 15               | 0.96               |
| Proteus     | Dataset 1 | Session 1        | 16.27929 | 0.33053 | 0.77466 | 0.00234 | Te-1             | 0.975                                                | 110              | 10                   | 6               | 1000        | 15               | 0.96               |
| Proteus     | Dataset 1 | Session 1        | 21.84122 | 0.46676 | 0.79771 | 0.00258 | Te-1             | 0.975                                                | 110              | 10                   | 6               | 1000        | 15               | 0.96               |
| Proteus     | Dataset 1 | Session 1        | 12.93642 | 0.32691 | 0.75956 | 0.00127 | Te-1             | 0.975                                                | 110              | 10                   | 6               | 1000        | 15               | 0.96               |
| Proteus     | Dataset 1 | Session 1        | 12.63181 | 0.26165 | 0.75880 | 0.00201 | Te-1             | 0.975                                                | 110              | 10                   | 6               | 1000        | 15               | 0.96               |
| Proteus     | Dataset 1 | Session 1        | 0.49105  | 0.12661 | 0.71073 | 0.00106 | Te-1             | 0.975                                                | 110              | 10                   | 6               | 1000        | 15               | 0.96               |
| Proteus     | Dataset 1 | Session 1        | 0.07991  | 0.07862 | 0.70909 | 0.00059 | Te-1             | 0.975                                                | 110              | 10                   | 6               | 1000        | 15               | 0.96               |
| Proteus     | Dataset 1 | Session 1        | 0.23147  | 0.05620 | 0.71030 | 0.00077 | Te-1             | 0.975                                                | 110              | 10                   | 6               | 1000        | 15               | 0.96               |
| Proteus     | Dataset 1 | Session 1        | 15.77071 | 0.57979 | 0.77000 | 0.00263 | Te-1             | 0.975                                                | 110              | 10                   | 6               | 1000        | 15               | 0.96               |
| Proteus     | Dataset 1 | Session 1        | 8.85642  | 0.88231 | 0.74384 | 0.00349 | Te-1             | 0.975                                                | 110              | 10                   | 6               | 1000        | 15               | 0.96               |
| Proteus     | Dataset 1 | Session 1        | 5.05375  | 1.27650 | 0.72743 | 0.00552 | Te-1             | 0.975                                                | 110              | 10                   | 6               | 1000        | 15               | 0.96               |
| Proteus     | Dataset 1 | Session 1        | 22.09719 | 0.52567 | 0.80182 | 0.00317 | Te-1             | 0.975                                                | 110              | 10                   | 6               | 1000        | 15               | 0.96               |
| Proteus     | Dataset 1 | Session 1        | 37.58319 | 8.40550 | 0.85815 | 0.01617 | Te-1             | 0.975                                                | 110              | 10                   | 6               | 1000        | 15               | 0.96               |
| Proteus     | Dataset 1 | Session 1        | 8.53530  | 0.47269 | 0.74203 | 0.00157 | Te-1             | 0.975                                                | 110              | 10                   | 6               | 1000        | 15               | 0.96               |
| Proteus     | Dataset 1 | Session 2        | 14.17142 | 0.39995 | 0.76457 | 0.00185 | Te-1             | 0.975                                                | 110              | 10                   | 6               | 1000        | 15               | 0.96               |
| Proteus     | Dataset 1 | Session 2        | 0.04023  | 0.00584 | 0.70840 | 0.00156 | Te-1             | 0.975                                                | 110              | 10                   | 6               | 1000        | 15               | 0.96               |
| Proteus     | Dataset 1 | Session 2        | 0.03656  | 0.00658 | 0.70899 | 0.00117 | Te-1             | 0.975                                                | 110              | 10                   | 6               | 1000        | 15               | 0.96               |
| Proteus     | Dataset 1 | Session 2        | 18.49334 | 0.56717 | 0.77910 | 0.00697 | Te-1             | 0.975                                                | 110              | 10                   | 6               | 1000        | 15               | 0.96               |
| Proteus     | Dataset 1 | Session 2        | 0.17587  | 0.02225 | 0.70942 | 0.00279 | Te-1             | 0.975                                                | 110              | 10                   | 6               | 1000        | 15               | 0.96               |
| Proteus     | Dataset 1 | Session 2        | 18.68593 | 0.43252 | 0.78341 | 0.00401 | Te-1             | 0.975                                                | 110              | 10                   | 6               | 1000        | 15               | 0.96               |
| Proteus     | Dataset 1 | Session 2        | 12.67146 | 0.23486 | 0.75884 | 0.00265 | Te-1             | 0.975                                                | 110              | 10                   | 6               | 1000        | 15               | 0.96               |
| Proteus     | Dataset 1 | Session 2        | 17.10492 | 0.41165 | 0.77552 | 0.00489 | Te-1             | 0.975                                                | 110              | 10                   | 6               | 1000        | 15               | 0.96               |
| Proteus     | Dataset 1 | Session 2        | 11.02758 | 0.39500 | 0.75191 | 0.00286 | Te-1             | 0.975                                                | 110              | 10                   | 6               | 1000        | 15               | 0.96               |
| Proteus     | Dataset 1 | Session 2        | 0.05449  | 0.00689 | 0.70900 | 0.00052 | Te-1             | 0.975                                                | 110              | 10                   | 6               | 1000        | 15               | 0.96               |
| Proteus     | Dataset 1 | Session 2        | 0.08850  | 0.02489 | 0.70971 | 0.00049 | Te-1             | 0.975                                                | 110              | 10                   | 6               | 1000        | 15               | 0.96               |
| Proteus     | Dataset 1 | Session 2        | 0.04946  | 0.00525 | 0.70965 | 0.00050 | Te-1             | 0.975                                                | 110              | 10                   | 6               | 1000        | 15               | 0.96               |
| Proteus     | Dataset 1 | Session 2        | 17.39552 | 0.39494 | 0.77771 | 0.00301 | Te-1             | 0.975                                                | 110              | 10                   | 6               | 1000        | 15               | 0.96               |
| Proteus     | Dataset 1 | Session 2        | 17.06159 | 0.22573 | 0.77818 | 0.00295 | Te-1             | 0.975                                                | 110              | 10                   | 6               | 1000        | 15               | 0.96               |
| Proteus     | Dataset 1 | Session 2        | 9.63567  | 1.12243 | 0.74770 | 0.00622 | Te-1             | 0.975                                                | 110              | 10                   | 6               | 1000        | 15               | 0.96               |
| Proteus     | Dataset 1 | Session 2        | 20.08128 | 0.61631 | 0.79182 | 0.00409 | Te-1             | 0.975                                                | 110</            |                      |                 |             |                  |                    |

|         |           |           |          |         |         |         |             |       |     |    |   |      |    |      |
|---------|-----------|-----------|----------|---------|---------|---------|-------------|-------|-----|----|---|------|----|------|
| Proteus | Dataset 1 | Session 3 | 0.04667  | 0.01304 | 0.70971 | 0.00026 | NIST SRM610 | 0.975 | 110 | 10 | 6 | 1000 | 15 | 0.96 |
| Proteus | Dataset 1 | Session 3 | 0.03400  | 0.00750 | 0.70955 | 0.00027 | NIST SRM610 | 0.975 | 110 | 10 | 6 | 1000 | 15 | 0.96 |
| Proteus | Dataset 1 | Session 3 | 18.91192 | 0.63519 | 0.78547 | 0.00264 | NIST SRM610 | 0.975 | 110 | 10 | 6 | 1000 | 15 | 0.96 |
| Proteus | Dataset 1 | Session 3 | 8.67859  | 0.08376 | 0.74479 | 0.00075 | NIST SRM610 | 0.975 | 110 | 10 | 6 | 1000 | 15 | 0.96 |
| Proteus | Dataset 1 | Session 3 | 20.99975 | 1.01399 | 0.79336 | 0.00333 | NIST SRM610 | 0.975 | 110 | 10 | 6 | 1000 | 15 | 0.96 |
| Proteus | Dataset 1 | Session 3 | 7.17670  | 0.09835 | 0.74108 | 0.00077 | NIST SRM610 | 0.975 | 110 | 10 | 6 | 1000 | 15 | 0.96 |
| Proteus | Dataset 1 | Session 3 | 42.22959 | 1.62741 | 0.87046 | 0.00342 | NIST SRM610 | 0.975 | 110 | 10 | 6 | 1000 | 15 | 0.96 |
| Proteus | Dataset 1 | Session 3 | 21.75644 | 0.33921 | 0.79484 | 0.00134 | NIST SRM610 | 0.975 | 110 | 10 | 6 | 1000 | 15 | 0.96 |
| Proteus | Dataset 1 | Session 3 | 0.03557  | 0.00096 | 0.70965 | 0.00049 | NIST SRM610 | 0.975 | 110 | 10 | 6 | 1000 | 15 | 0.96 |
| Proteus | Dataset 1 | Session 3 | 0.05888  | 0.00879 | 0.70965 | 0.00045 | NIST SRM610 | 0.975 | 110 | 10 | 6 | 1000 | 15 | 0.96 |
| Proteus | Dataset 1 | Session 3 | 0.03565  | 0.00051 | 0.70978 | 0.00065 | NIST SRM610 | 0.975 | 110 | 10 | 6 | 1000 | 15 | 0.96 |
| Proteus | Dataset 1 | Session 3 | 8.44606  | 0.05755 | 0.74404 | 0.00076 | NIST SRM610 | 0.975 | 110 | 10 | 6 | 1000 | 15 | 0.96 |
| Proteus | Dataset 1 | Session 3 | 21.10882 | 0.61636 | 0.79486 | 0.00287 | NIST SRM610 | 0.975 | 110 | 10 | 6 | 1000 | 15 | 0.96 |
| Proteus | Dataset 1 | Session 3 | 7.27706  | 0.04486 | 0.73887 | 0.00095 | NIST SRM610 | 0.975 | 110 | 10 | 6 | 1000 | 15 | 0.96 |
| Proteus | Dataset 1 | Session 3 | 21.86816 | 0.26140 | 0.79524 | 0.00111 | NIST SRM610 | 0.975 | 110 | 10 | 6 | 1000 | 15 | 0.96 |
| Proteus | Dataset 1 | Session 3 | 5.33294  | 0.34415 | 0.73201 | 0.00163 | NIST SRM610 | 0.975 | 110 | 10 | 6 | 1000 | 15 | 0.96 |
| Proteus | Dataset 1 | Session 3 | 0.52860  | 0.72489 | 0.70966 | 0.00093 | NIST SRM610 | 0.975 | 110 | 10 | 6 | 1000 | 15 | 0.96 |
| Proteus | Dataset 1 | Session 3 | 0.48089  | 0.06591 | 0.71157 | 0.00071 | NIST SRM610 | 0.975 | 110 | 10 | 6 | 1000 | 15 | 0.96 |
| Proteus | Dataset 1 | Session 3 | 0.06345  | 0.01628 | 0.70909 | 0.00058 | NIST SRM610 | 0.975 | 110 | 10 | 6 | 1000 | 15 | 0.96 |
| Proteus | Dataset 1 | Session 3 | 13.01387 | 0.22061 | 0.76009 | 0.00128 | NIST SRM610 | 0.975 | 110 | 10 | 6 | 1000 | 15 | 0.96 |
| Proteus | Dataset 1 | Session 3 | 7.95771  | 0.08028 | 0.74099 | 0.00060 | NIST SRM610 | 0.975 | 110 | 10 | 6 | 1000 | 15 | 0.96 |
| Proteus | Dataset 1 | Session 3 | 9.17823  | 0.10410 | 0.74493 | 0.00104 | NIST SRM610 | 0.975 | 110 | 10 | 6 | 1000 | 15 | 0.96 |
| Proteus | Dataset 1 | Session 3 | 9.04757  | 0.17688 | 0.74457 | 0.00109 | NIST SRM610 | 0.975 | 110 | 10 | 6 | 1000 | 15 | 0.96 |
| Proteus | Dataset 1 | Session 3 | 0.03383  | 0.00326 | 0.70964 | 0.00025 | NIST SRM610 | 0.975 | 110 | 10 | 6 | 1000 | 15 | 0.96 |
| Proteus | Dataset 1 | Session 3 | 0.04437  | 0.00895 | 0.70999 | 0.00021 | NIST SRM610 | 0.975 | 110 | 10 | 6 | 1000 | 15 | 0.96 |
| Proteus | Dataset 1 | Session 3 | 9.20290  | 0.05866 | 0.74729 | 0.00067 | NIST SRM610 | 0.975 | 110 | 10 | 6 | 1000 | 15 | 0.96 |
| Proteus | Dataset 1 | Session 3 | 21.25398 | 0.22080 | 0.79444 | 0.00110 | NIST SRM610 | 0.975 | 110 | 10 | 6 | 1000 | 15 | 0.96 |
| Proteus | Dataset 1 | Session 3 | 23.80091 | 0.20062 | 0.80337 | 0.00137 | NIST SRM610 | 0.975 | 110 | 10 | 6 | 1000 | 15 | 0.96 |
| Proteus | Dataset 1 | Session 3 | 7.06919  | 0.06487 | 0.73814 | 0.00062 | NIST SRM610 | 0.975 | 110 | 10 | 6 | 1000 | 15 | 0.96 |
| Proteus | Dataset 1 | Session 3 | 29.81628 | 0.52335 | 0.82753 | 0.00228 | NIST SRM610 | 0.975 | 110 | 10 | 6 | 1000 | 15 | 0.96 |
| Proteus | Dataset 1 | Session 3 | 11.18680 | 0.35758 | 0.75361 | 0.00141 | NIST SRM610 | 0.975 | 110 | 10 | 6 | 1000 | 15 | 0.96 |
| Proteus | Dataset 1 | Session 3 | 0.04013  | 0.00140 | 0.70942 | 0.00029 | NIST SRM610 | 0.975 | 110 | 10 | 6 | 1000 | 15 | 0.96 |
| Proteus | Dataset 1 | Session 3 | 26.36969 | 0.68527 | 0.81093 | 0.00323 | NIST SRM610 | 0.975 | 110 | 10 | 6 | 1000 | 15 | 0.96 |
| Proteus | Dataset 1 | Session 3 | 9.53591  | 0.12233 | 0.74753 | 0.00072 | NIST SRM610 | 0.975 | 110 | 10 | 6 | 1000 | 15 | 0.96 |
| Proteus | Dataset 1 | Session 3 | 20.73994 | 0.80576 | 0.79421 | 0.00382 | NIST SRM610 | 0.975 | 110 | 10 | 6 | 1000 | 15 | 0.96 |
| Proteus | Dataset 1 | Session 3 | 35.93434 | 0.76736 | 0.85195 | 0.00277 | NIST SRM610 | 0.975 | 110 | 10 | 6 | 1000 | 15 | 0.96 |
| Proteus | Dataset 1 | Session 3 | 6.16185  | 0.04169 | 0.73499 | 0.00057 | NIST SRM610 | 0.975 | 110 | 10 | 6 | 1000 | 15 | 0.96 |
| Proteus | Dataset 1 | Session 3 | 34.28246 | 0.74489 | 0.84558 | 0.00229 | NIST SRM610 | 0.975 | 110 | 10 | 6 | 1000 | 15 | 0.96 |
| Proteus | Dataset 1 | Session 3 | 18.30607 | 0.21374 | 0.78295 | 0.00113 | NIST SRM610 | 0.975 | 110 | 10 | 6 | 1000 | 15 | 0.96 |
| Proteus | Dataset 1 | Session 3 | 0.03781  | 0.00294 | 0.70938 | 0.00038 | NIST SRM610 | 0.975 | 110 | 10 | 6 | 1000 | 15 | 0.96 |
| Proteus | Dataset 1 | Session 3 | 0.05502  | 0.00265 | 0.70921 | 0.00048 | NIST SRM610 | 0.975 | 110 | 10 | 6 | 1000 | 15 | 0.96 |
| Proteus | Dataset 1 | Session 3 | 19.34270 | 0.65191 | 0.78446 | 0.00298 | NIST SRM610 | 0.975 | 110 | 10 | 6 | 1000 | 15 | 0.96 |
| Proteus | Dataset 1 | Session 3 | 7.33707  | 0.05048 | 0.73823 | 0.00052 | NIST SRM610 | 0.975 | 110 | 10 | 6 | 1000 | 15 | 0.96 |
| Proteus | Dataset 1 | Session 3 | 23.21784 | 0.62390 | 0.80184 | 0.00225 | NIST SRM610 | 0.975 | 110 | 10 | 6 | 1000 | 15 | 0.96 |
| Proteus | Dataset 1 | Session 3 | 6.78037  | 0.04103 | 0.73650 | 0.00055 | NIST SRM610 | 0.975 | 110 | 10 | 6 | 1000 | 15 | 0.96 |
| Proteus | Dataset 1 | Session 3 | 23.55066 | 0.32247 | 0.80001 | 0.00140 | NIST SRM610 | 0.975 | 110 | 10 | 6 | 1000 | 15 | 0.96 |
| Proteus | Dataset 1 | Session 4 | 21.36103 | 0.79135 | 0.79313 | 0.00386 | Te-1        | 0.975 | 110 | 10 | 6 | 1000 | 15 | 0.96 |
| Proteus | Dataset 1 | Session 4 | 8.69609  | 0.27133 | 0.74375 | 0.00110 | Te-1        | 0.975 | 110 | 10 | 6 | 1000 | 15 | 0.96 |
| Proteus | Dataset 1 | Session 4 | 10.38568 | 0.14742 | 0.75185 | 0.00144 | Te-1        | 0.975 | 110 | 10 | 6 | 1000 | 15 | 0.96 |
| Proteus | Dataset 1 | Session 4 | 25.30093 | 0.21148 | 0.81138 | 0.00238 | Te-1        | 0.975 | 110 | 10 | 6 | 1000 | 15 | 0.96 |
| Proteus | Dataset 1 | Session 4 | 8.20372  | 0.54895 | 0.74258 | 0.00230 | Te-1        | 0.975 | 110 | 10 | 6 | 1000 | 15 | 0.96 |
| Proteus | Dataset 1 | Session 4 | 22.63651 | 0.39423 | 0.79888 | 0.00233 | Te-1        | 0.975 | 110 | 10 | 6 | 1000 | 15 | 0.96 |
| Proteus | Dataset 1 | Session 4 | 9.14653  | 0.13502 | 0.74549 | 0.00107 | Te-1        | 0.975 | 110 | 10 | 6 | 1000 | 15 | 0.96 |
| Proteus | Dataset 1 | Session 4 | 9.23077  | 1.90195 | 0.74311 | 0.00857 | Te-1        | 0.975 | 110 | 10 | 6 | 1000 | 15 | 0.96 |
| Proteus | Dataset 1 | Session 4 | 0.03228  | 0.00360 | 0.70978 | 0.00056 | Te-1        | 0.975 | 110 | 10 | 6 | 1000 | 15 | 0.96 |
| Proteus | Dataset 1 | Session 4 | 17.13764 | 0.32337 | 0.77696 | 0.00246 | Te-1        | 0.975 | 110 | 10 | 6 | 1000 | 15 | 0.96 |
| Proteus | Dataset 1 | Session 5 | 0.03400  | 0.00170 | 0.70979 | 0.00050 | NIST SRM610 | 0.975 | 110 | 10 | 6 | 1000 | 15 | 0.96 |
| Proteus | Dataset 1 | Session 5 | 0.06351  | 0.03091 | 0.70957 | 0.00054 | NIST SRM610 | 0.975 | 110 | 10 | 6 | 1000 | 15 | 0.96 |
| Proteus | Dataset 1 | Session 5 | 24.53127 | 0.74301 | 0.80818 | 0.00510 | NIST SRM610 | 0.975 | 110 | 10 | 6 | 1000 | 15 | 0.96 |
| Proteus | Dataset 1 | Session 5 | 24.58162 | 0.46269 | 0.80584 | 0.00251 | NIST SRM610 | 0.975 | 110 | 10 | 6 | 1000 | 15 | 0.96 |
| Proteus | Dataset 1 | Session 5 | 17.28797 | 1.93832 | 0.78001 | 0.00809 | NIST SRM610 | 0.975 | 110 | 10 | 6 | 1000 | 15 | 0.96 |
| Proteus | Dataset 1 | Session 5 | 16.14368 | 0.22533 | 0.77426 | 0.00122 | NIST SRM610 | 0.975 | 110 | 10 | 6 | 1000 | 15 | 0.96 |
| Proteus | Dataset 1 | Session 5 | 0.04112  | 0.00587 | 0.70959 | 0.00058 | NIST SRM610 | 0.975 | 110 | 10 | 6 | 1000 | 15 | 0.96 |
| Proteus | Dataset 1 | Session 5 | 0.02825  | 0.00063 | 0.70972 | 0.00061 | NIST SRM610 | 0.975 | 110 | 10 | 6 | 1000 | 15 | 0.96 |
| Proteus | Dataset 1 | Session 5 | 4.89699  | 0.29817 | 0.72861 | 0.00150 | NIST SRM610 | 0.975 | 110 | 10 | 6 | 1000 | 15 | 0.96 |
| Proteus | Dataset 1 | Session 5 | 17.44157 | 0.28813 | 0.77788 | 0.00141 | NIST SRM610 | 0.975 | 110 | 10 | 6 | 1000 | 15 | 0.96 |
| Proteus | Dataset 1 | Session 5 | 23.85963 | 0.50559 | 0.80099 | 0.00420 | NIST SRM610 | 0.975 | 110 | 10 | 6 | 1000 | 15 | 0.96 |
| Proteus | Dataset 1 | Session 5 | 15.51928 | 0.22463 | 0.77042 | 0.00116 | NIST SRM610 | 0.975 | 110 | 10 | 6 | 1000 | 15 | 0.96 |
| Proteus | Dataset 1 | Session 6 | 0.06808  | 0.01136 | 0.70940 | 0.00080 | Te-1        | 0.975 | 110 | 10 | 6 | 1000 | 15 | 0.96 |
| Proteus | Dataset 1 | Session 6 | 21.65363 | 0.15597 | 0.79791 | 0.00254 | Te-1        | 0.975 | 110 | 10 | 6 | 1000 | 15 | 0.96 |
| Proteus | Dataset 1 | Session 6 | 13.66038 | 0.28719 | 0.76488 | 0.00108 | Te-1        | 0.975 | 110 | 10 | 6 | 1000 | 15 | 0.96 |
| Proteus | Dataset 1 | Session 6 | 20.63731 | 0.57030 | 0.79123 | 0.00308 | Te-1        | 0.975 | 110 | 10 | 6 | 1000 | 15 | 0.96 |
| Proteus | Dataset 1 | Session 6 | 20.37970 | 0.50168 | 0.79118 | 0.00269 | Te-1        | 0.975 | 110 | 10 | 6 | 1000 | 15 | 0.96 |
| Proteus | Dataset 1 | Session 6 | 23.03552 | 0.31540 | 0.79959 | 0.00216 | Te-1        | 0.975 | 110 | 10 | 6 | 1000 | 15 | 0.96 |
| Proteus | Dataset 1 | Session 6 | 0.05217  | 0.00837 | 0.71026 | 0.00056 | Te-1        | 0.975 | 110 | 10 | 6 | 1000 | 15 | 0.96 |
| Proteus | Dataset 1 | Session 6 | 20.42554 | 0.18142 | 0.79333 | 0.00167 | Te-1        | 0.975 | 110 | 10 | 6 | 1000 | 15 | 0.96 |
| Proteus | Dataset 1 | Session 6 | 1.48573  | 0.18240 | 0.71587 | 0.00141 | Te-1        | 0.975 | 110 | 10 | 6 | 1000 | 15 | 0.96 |
| Proteus | Dataset 1 | Session 6 | 24.30470 | 1.23054 | 0.80696 | 0.00483 | Te-1        | 0.975 | 110 | 10 | 6 | 1000 | 15 | 0.96 |
| Proteus | Dataset 1 | Session 6 | 14.09719 | 0.19604 | 0.76737 | 0.00147 | Te-1        | 0.975 | 110 | 10 | 6 | 1000 | 15 | 0.96 |
| Proteus | Dataset 1 | Session 6 | 21.65698 | 0.49759 | 0.79529 | 0.00291 | Te-1        | 0.975 | 110 | 10 | 6 | 1000 | 15 | 0.96 |
| Proteus | Dataset 2 | Session 7 | 0.04302  | 0.00286 | 0.70972 | 0.00068 | Te-1        | 1.004 | 110 | 10 | 6 | 1000 | 15 | 0.88 |
| Proteus | Dataset 2 | Session 7 | 11.44827 | 0.32246 | 0.75599 | 0.00231 | Te-1        | 1.004 | 110 | 10 | 6 | 1000 | 15 | 0.88 |
| Proteus | Dataset 2 | Session 7 | 20.79770 | 0.86283 | 0.79139 | 0.00310 | Te-1        | 1.004 | 110 | 10 | 6 | 1000 | 15 | 0.88 |
| Proteus | Dataset 2 | Session 7 | 19.11298 | 0.28861 | 0.78654 | 0.00227 | Te-1        | 1.004 | 110 | 10 | 6 | 1000 | 15 | 0.88 |
| Proteus | Dataset 2 | Session 7 | 24.84638 | 0.90635 | 0.80327 | 0.00357 | Te-1        | 1.004 | 110 | 10 | 6 | 1000 | 15 | 0.88 |
| Proteus | Dataset 2 | Session 7 | 0.11233  | 0.00884 | 0.71194 | 0.00095 | Te-1        | 1.004 | 110 | 10 | 6 | 1000 | 15 | 0.88 |
|         |           |           |          |         |         |         |             |       |     |    |   |      |    |      |

|         |           |           |          |           |         |         |             |       |     |    |   |      |    |      |
|---------|-----------|-----------|----------|-----------|---------|---------|-------------|-------|-----|----|---|------|----|------|
| Proteus | Dataset 2 | Session 8 | 11.97545 | 0.17595   | 0.75720 | 0.00134 | NIST SRM610 | 1.004 | 110 | 10 | 6 | 1000 | 15 | 0.88 |
| Proteus | Dataset 2 | Session 8 | 16.43368 | 1.07751   | 0.72211 | 0.00429 | NIST SRM610 | 1.004 | 110 | 10 | 6 | 1000 | 15 | 0.88 |
| Proteus | Dataset 2 | Session 8 | 0.05119  | 0.00596   | 0.70993 | 0.00101 | NIST SRM610 | 1.004 | 110 | 10 | 6 | 1000 | 15 | 0.88 |
| Proteus | Dataset 2 | Session 8 | 16.75528 | 0.21630   | 0.77726 | 0.00190 | NIST SRM610 | 1.004 | 110 | 10 | 6 | 1000 | 15 | 0.88 |
| Proteus | Dataset 2 | Session 8 | 21.66142 | 0.23480   | 0.79354 | 0.00259 | NIST SRM610 | 1.004 | 110 | 10 | 6 | 1000 | 15 | 0.88 |
| Proteus | Dataset 2 | Session 8 | 9.67616  | 0.75710   | 0.74613 | 0.00389 | NIST SRM610 | 1.004 | 110 | 10 | 6 | 1000 | 15 | 0.88 |
| Proteus | Dataset 2 | Session 8 | 14.78409 | 0.17795   | 0.76733 | 0.00200 | NIST SRM610 | 1.004 | 110 | 10 | 6 | 1000 | 15 | 0.88 |
| Proteus | Dataset 2 | Session 8 | 0.05312  | 0.00931   | 0.70935 | 0.00066 | NIST SRM610 | 1.004 | 110 | 10 | 6 | 1000 | 15 | 0.88 |
| Proteus | Dataset 2 | Session 8 | 0.02877  | 0.00307   | 0.70924 | 0.00078 | NIST SRM610 | 1.004 | 110 | 10 | 6 | 1000 | 15 | 0.88 |
| Proteus | Dataset 2 | Session 8 | 19.09594 | 0.28460   | 0.78523 | 0.00229 | NIST SRM610 | 1.004 | 110 | 10 | 6 | 1000 | 15 | 0.88 |
| Proteus | Dataset 2 | Session 8 | 15.25174 | 0.76347   | 0.76891 | 0.00315 | NIST SRM610 | 1.004 | 110 | 10 | 6 | 1000 | 15 | 0.88 |
| Proteus | Dataset 2 | Session 8 | 20.47105 | 0.19599   | 0.78854 | 0.00272 | NIST SRM610 | 1.004 | 110 | 10 | 6 | 1000 | 15 | 0.88 |
| Proteus | Dataset 2 | Session 8 | 16.75777 | 0.13353   | 0.77956 | 0.00180 | NIST SRM610 | 1.004 | 110 | 10 | 6 | 1000 | 15 | 0.88 |
| Proteus | Dataset 2 | Session 8 | 18.43309 | 0.31085   | 0.78366 | 0.00214 | NIST SRM610 | 1.004 | 110 | 10 | 6 | 1000 | 15 | 0.88 |
| Proteus | Dataset 2 | Session 8 | 0.06704  | 0.01639   | 0.71079 | 0.00087 | NIST SRM610 | 1.004 | 110 | 10 | 6 | 1000 | 15 | 0.88 |
| Proteus | Dataset 2 | Session 8 | 0.13846  | 0.02894   | 0.71073 | 0.00082 | NIST SRM610 | 1.004 | 110 | 10 | 6 | 1000 | 15 | 0.88 |
| Proteus | Dataset 2 | Session 8 | 17.52525 | 0.36066   | 0.78107 | 0.00239 | NIST SRM610 | 1.004 | 110 | 10 | 6 | 1000 | 15 | 0.88 |
| Proteus | Dataset 2 | Session 8 | 0.26851  | 0.04340   | 0.71126 | 0.00138 | NIST SRM610 | 1.004 | 110 | 10 | 6 | 1000 | 15 | 0.88 |
| Proteus | Dataset 2 | Session 8 | 19.82169 | 0.18725   | 0.78704 | 0.00237 | NIST SRM610 | 1.004 | 110 | 10 | 6 | 1000 | 15 | 0.88 |
| Proteus | Dataset 2 | Session 8 | 14.25626 | 0.15013   | 0.76782 | 0.00156 | NIST SRM610 | 1.004 | 110 | 10 | 6 | 1000 | 15 | 0.88 |
| Proteus | Dataset 2 | Session 8 | 17.27976 | 0.12836   | 0.77684 | 0.00229 | NIST SRM610 | 1.004 | 110 | 10 | 6 | 1000 | 15 | 0.88 |
| Proteus | Dataset 2 | Session 8 | 0.03468  | 0.00314   | 0.70963 | 0.00070 | NIST SRM610 | 1.004 | 110 | 10 | 6 | 1000 | 15 | 0.88 |
| Proteus | Dataset 2 | Session 8 | 15.44654 | 0.18568   | 0.77344 | 0.00176 | NIST SRM610 | 1.004 | 110 | 10 | 6 | 1000 | 15 | 0.88 |
| Proteus | Dataset 2 | Session 8 | 18.86209 | 0.24156   | 0.78304 | 0.00205 | NIST SRM610 | 1.004 | 110 | 10 | 6 | 1000 | 15 | 0.88 |
| Proteus | Dataset 2 | Session 8 | 0.17621  | 0.06779   | 0.71064 | 0.00109 | NIST SRM610 | 1.004 | 110 | 10 | 6 | 1000 | 15 | 0.88 |
| Proteus | Dataset 2 | Session 8 | 18.70392 | 0.41286   | 0.78349 | 0.00234 | NIST SRM610 | 1.004 | 110 | 10 | 6 | 1000 | 15 | 0.88 |
| Proteus | Dataset 2 | Session 9 | 0.03256  | 0.00393   | 0.70953 | 0.00076 | NIST SRM610 | 1.004 | 110 | 10 | 6 | 1000 | 15 | 0.88 |
| Proteus | Dataset 2 | Session 9 | 24.32619 | 0.49807   | 0.80217 | 0.00339 | NIST SRM610 | 1.004 | 110 | 10 | 6 | 1000 | 15 | 0.88 |
| Proteus | Dataset 2 | Session 9 | 21.65554 | 0.61893   | 0.79309 | 0.00505 | NIST SRM610 | 1.004 | 110 | 10 | 6 | 1000 | 15 | 0.88 |
| Proteus | Dataset 2 | Session 9 | 0.09481  | 0.05009   | 0.70974 | 0.00070 | NIST SRM610 | 1.004 | 110 | 10 | 6 | 1000 | 15 | 0.88 |
| Proteus | Dataset 2 | Session 9 | 0.22456  | 0.04738   | 0.71035 | 0.00068 | NIST SRM610 | 1.004 | 110 | 10 | 6 | 1000 | 15 | 0.88 |
| Proteus | Dataset 2 | Session 9 | 17.85015 | 0.44887   | 0.77971 | 0.00300 | NIST SRM610 | 1.004 | 110 | 10 | 6 | 1000 | 15 | 0.88 |
| Proteus | Dataset 2 | Session 9 | 19.82926 | 0.88964   | 0.78817 | 0.00366 | NIST SRM610 | 1.004 | 110 | 10 | 6 | 1000 | 15 | 0.88 |
| Proteus | Dataset 2 | Session 9 | 10.18145 | 0.45671   | 0.75126 | 0.00247 | NIST SRM610 | 1.004 | 110 | 10 | 6 | 1000 | 15 | 0.88 |
| Proteus | Dataset 2 | Session 9 | 10.66480 | 0.20832   | 0.75130 | 0.00161 | NIST SRM610 | 1.004 | 110 | 10 | 6 | 1000 | 15 | 0.88 |
| Proteus | Dataset 2 | Session 9 | 12.15688 | 0.31305   | 0.75892 | 0.00147 | NIST SRM610 | 1.004 | 110 | 10 | 6 | 1000 | 15 | 0.88 |
| Proteus | Dataset 2 | Session 9 | 20.18169 | 0.34186   | 0.79106 | 0.00276 | NIST SRM610 | 1.004 | 110 | 10 | 6 | 1000 | 15 | 0.88 |
| Proteus | Dataset 2 | Session 9 | 0.03016  | 0.00134   | 0.70952 | 0.00064 | NIST SRM610 | 1.004 | 110 | 10 | 6 | 1000 | 15 | 0.88 |
| Proteus | Dataset 2 | Session 9 | 33.36005 | 0.76812   | 0.83533 | 0.00474 | NIST SRM610 | 1.004 | 110 | 10 | 6 | 1000 | 15 | 0.88 |
| Proteus | Dataset 2 | Session 9 | 25.81753 | 0.44864   | 0.81245 | 0.00338 | NIST SRM610 | 1.004 | 110 | 10 | 6 | 1000 | 15 | 0.88 |
| Proteus | Dataset 2 | Session 9 | 33.76158 | 0.84821   | 0.84244 | 0.00642 | NIST SRM610 | 1.004 | 110 | 10 | 6 | 1000 | 15 | 0.88 |
| Proteus | Dataset 2 | Session 9 | 31.53109 | 0.85359   | 0.83738 | 0.00458 | NIST SRM610 | 1.004 | 110 | 10 | 6 | 1000 | 15 | 0.88 |
| Proteus | Dataset 2 | Session 9 | 21.84393 | 0.33711   | 0.79925 | 0.00302 | NIST SRM610 | 1.004 | 110 | 10 | 6 | 1000 | 15 | 0.88 |
| Proteus | Dataset 2 | Session 9 | 14.29416 | 0.19776   | 0.76670 | 0.00173 | NIST SRM610 | 1.004 | 110 | 10 | 6 | 1000 | 15 | 0.88 |
| Proteus | Dataset 2 | Session 9 | 16.33097 | 0.44489   | 0.77356 | 0.00218 | NIST SRM610 | 1.004 | 110 | 10 | 6 | 1000 | 15 | 0.88 |
| Proteus | Dataset 2 | Session 9 | 14.07439 | 0.34036   | 0.76518 | 0.00217 | NIST SRM610 | 1.004 | 110 | 10 | 6 | 1000 | 15 | 0.88 |
| Proteus | Dataset 2 | Session 9 | 23.44960 | 0.72495   | 0.80227 | 0.00412 | NIST SRM610 | 1.004 | 110 | 10 | 6 | 1000 | 15 | 0.88 |
| Proteus | Dataset 2 | Session 9 | 13.74829 | 0.44366   | 0.76462 | 0.00259 | NIST SRM610 | 1.004 | 110 | 10 | 6 | 1000 | 15 | 0.88 |
| Proteus | Dataset 2 | Session 9 | 10.07878 | 0.42134   | 0.75059 | 0.00167 | NIST SRM610 | 1.004 | 110 | 10 | 6 | 1000 | 15 | 0.88 |
| Proteus | Dataset 2 | Session 9 | 13.97324 | 0.32204   | 0.76485 | 0.00213 | NIST SRM610 | 1.004 | 110 | 10 | 6 | 1000 | 15 | 0.88 |
| Proteus | Dataset 2 | Session 9 | 14.89640 | 0.10932   | 0.76997 | 0.00182 | NIST SRM610 | 1.004 | 110 | 10 | 6 | 1000 | 15 | 0.88 |
| Proteus | Dataset 2 | Session 9 | 24.74709 | 0.78941   | 0.81219 | 0.00367 | NIST SRM610 | 1.004 | 110 | 10 | 6 | 1000 | 15 | 0.88 |
| Proteus | Dataset 2 | Session 9 | 30.78121 | 1.11113   | 0.83015 | 0.00399 | NIST SRM610 | 1.004 | 110 | 10 | 6 | 1000 | 15 | 0.88 |
| Proteus | Dataset 2 | Session 9 | 0.02635  | 0.00115   | 0.70886 | 0.00084 | NIST SRM610 | 1.004 | 110 | 10 | 6 | 1000 | 15 | 0.88 |
| Proteus | Dataset 2 | Session 9 | 6.36276  | 0.09659   | 0.73570 | 0.00098 | NIST SRM610 | 1.004 | 110 | 10 | 6 | 1000 | 15 | 0.88 |
| Proteus | Dataset 2 | Session 9 | 8.43038  | 0.12281   | 0.74230 | 0.00115 | NIST SRM610 | 1.004 | 110 | 10 | 6 | 1000 | 15 | 0.88 |
| Proteus | Dataset 2 | Session 9 | 9.24710  | 0.26347   | 0.74464 | 0.00143 | NIST SRM610 | 1.004 | 110 | 10 | 6 | 1000 | 15 | 0.88 |
| Proteus | Dataset 2 | Session 9 | 33.18737 | 0.64164   | 0.83777 | 0.00509 | NIST SRM610 | 1.004 | 110 | 10 | 6 | 1000 | 15 | 0.88 |
| Proteus | Dataset 2 | Session 9 | 15.44836 | 0.40515   | 0.75513 | 0.02990 | NIST SRM610 | 1.004 | 110 | 10 | 6 | 1000 | 15 | 0.88 |
| Proteus | Dataset 2 | Session 9 | 0.02595  | 0.00210   | 0.70854 | 0.00105 | NIST SRM610 | 1.004 | 110 | 10 | 6 | 1000 | 15 | 0.88 |
| Proteus | Dataset 2 | Session 9 | 0.02891  | 0.00356   | 0.70988 | 0.00090 | NIST SRM610 | 1.004 | 110 | 10 | 6 | 1000 | 15 | 0.88 |
| Proteus | Dataset 2 | Session 9 | 0.02609  | 0.00157   | 0.70879 | 0.00076 | NIST SRM610 | 1.004 | 110 | 10 | 6 | 1000 | 15 | 0.88 |
| Proteus | Dataset 2 | Session 9 | 26.56715 | 0.48811   | 0.81837 | 0.00368 | NIST SRM610 | 1.004 | 110 | 10 | 6 | 1000 | 15 | 0.88 |
| Proteus | Dataset 2 | Session 9 | 24.96468 | 0.29943   | 0.80904 | 0.00405 | NIST SRM610 | 1.004 | 110 | 10 | 6 | 1000 | 15 | 0.88 |
| Proteus | Dataset 2 | Session 9 | 24.07989 | 0.36763   | 0.80231 | 0.00405 | NIST SRM610 | 1.004 | 110 | 10 | 6 | 1000 | 15 | 0.88 |
| Proteus | Dataset 2 | Session 9 | 0.06827  | 0.01000   | 0.70995 | 0.00085 | NIST SRM610 | 1.004 | 110 | 10 | 6 | 1000 | 15 | 0.88 |
| Proteus | Dataset 2 | Session 9 | 26.46459 | 0.80080   | 0.81558 | 0.00394 | NIST SRM610 | 1.004 | 110 | 10 | 6 | 1000 | 15 | 0.88 |
| Proteus | Dataset 2 | Session 9 | 25.05711 | 0.60045   | 0.80708 | 0.00351 | NIST SRM610 | 1.004 | 110 | 10 | 6 | 1000 | 15 | 0.88 |
| Proteus | Dataset 2 | Session 9 | 22.82202 | 0.50254   | 0.80067 | 0.00330 | NIST SRM610 | 1.004 | 110 | 10 | 6 | 1000 | 15 | 0.88 |
| Proteus | Dataset 2 | Session 9 | 22.84913 | 0.43783   | 0.80300 | 0.00285 | NIST SRM610 | 1.004 | 110 | 10 | 6 | 1000 | 15 | 0.88 |
| Proteus | Dataset 2 | Session 9 | 22.76904 | 0.59881   | 0.79600 | 0.00346 | NIST SRM610 | 1.004 | 110 | 10 | 6 | 1000 | 15 | 0.88 |
| Proteus | Dataset 2 | Session 9 | 8.82093  | 1.68100   | 0.74052 | 0.00138 | NIST SRM610 | 1.004 | 110 | 10 | 6 | 1000 | 15 | 0.88 |
| Proteus | Dataset 2 | Session 9 | 10.00961 | 0.24720   | 0.74930 | 0.00164 | NIST SRM610 | 1.004 | 110 | 10 | 6 | 1000 | 15 | 0.88 |
| Proteus | Dataset 2 | Session 9 | 8.98030  | 0.07214   | 0.74490 | 0.00138 | NIST SRM610 | 1.004 | 110 | 10 | 6 | 1000 | 15 | 0.88 |
| Proteus | Dataset 2 | Session 9 | 9.05521  | 0.21355   | 0.74479 | 0.00117 | NIST SRM610 | 1.004 | 110 | 10 | 6 | 1000 | 15 | 0.88 |
| Proteus | Dataset 2 | Session 9 | 7.88857  | 0.10497   | 0.74110 | 0.00136 | NIST SRM610 | 1.004 | 110 | 10 | 6 | 1000 | 15 | 0.88 |
| Proteus | Dataset 2 | Session 9 | 36.71359 | 0.67307   | 0.84878 | 0.00437 | NIST SRM610 | 1.004 | 110 | 10 | 6 | 1000 | 15 | 0.88 |
| Proteus | Dataset 2 | Session 9 | 0.03670  | 0.00185   | 0.70968 | 0.00066 | NIST SRM610 | 1.004 | 110 | 10 | 6 | 1000 | 15 | 0.88 |
| Proteus | Dataset 2 | Session 9 | 23.64461 | 0.84208   | 0.80327 | 0.00315 | NIST SRM610 | 1.004 | 110 | 10 | 6 | 1000 | 15 | 0.88 |
| Proteus | Dataset 2 | Session 9 | 22.06494 | 0.59710   | 0.79704 | 0.00300 | NIST SRM610 | 1.004 | 110 | 10 | 6 | 1000 | 15 | 0.88 |
| Proteus | Dataset 2 | Session 9 | 26.11891 | 0.57146   | 0.81322 | 0.00404 | NIST SRM610 | 1.004 | 110 | 10 | 6 | 1000 | 15 | 0.88 |
| Proteus | Dataset 2 | Session 9 | 22.99356 | 0.85668   | 0.80054 | 0.00277 | NIST SRM610 | 1.004 | 110 | 10 | 6 | 1000 | 15 | 0.88 |
| Proteus | Dataset 2 | Session 9 | 8.01673  | 0.15766   | 0.74240 | 0.00119 | NIST SRM610 | 1.004 | 110 | 10 | 6 | 1000 | 15 | 0.88 |
| Proteus | Dataset 2 | Session 9 | 10.00189 | 0.16708   | 0.74975 | 0.00141 | NIST SRM610 | 1.004 | 110 | 10 | 6 | 1000 | 15 | 0.88 |
| Proteus | Dataset 2 | Session 9 | 10.50889 | 0.14250   | 0.75096 | 0.00131 | NIST SRM610 | 1.004 | 110 | 10 | 6 | 1000 | 15 | 0.88 |
| Proteus | Dataset 2 | Session 9 | 7.90945  | 0.12109</ |         |         |             |       |     |    |   |      |    |      |

|         |           |           |          |         |         |         |             |       |     |    |   |      |    |      |
|---------|-----------|-----------|----------|---------|---------|---------|-------------|-------|-----|----|---|------|----|------|
| Proteus | Dataset 1 | Session 5 | 16.32591 | 2.02096 | 0.71247 | 0.00284 | NIST SRM610 | 0.975 | 110 | 10 | 6 | 1000 | 15 | 0.96 |
| Proteus | Dataset 1 | Session 5 | 19.44340 | 4.49018 | 0.71492 | 0.00268 | NIST SRM610 | 0.975 | 110 | 10 | 6 | 1000 | 15 | 0.96 |
| Proteus | Dataset 1 | Session 5 | 21.50326 | 1.77026 | 0.71495 | 0.00349 | NIST SRM610 | 0.975 | 110 | 10 | 6 | 1000 | 15 | 0.96 |
| Proteus | Dataset 1 | Session 5 | 29.50398 | 1.98087 | 0.71818 | 0.00406 | NIST SRM610 | 0.975 | 110 | 10 | 6 | 1000 | 15 | 0.96 |
| Proteus | Dataset 1 | Session 5 | 38.51357 | 8.02509 | 0.71590 | 0.00316 | NIST SRM610 | 0.975 | 110 | 10 | 6 | 1000 | 15 | 0.96 |
| Proteus | Dataset 1 | Session 5 | 19.53996 | 1.43813 | 0.71473 | 0.00356 | NIST SRM610 | 0.975 | 110 | 10 | 6 | 1000 | 15 | 0.96 |
| Proteus | Dataset 1 | Session 5 | 11.71703 | 3.93209 | 0.71060 | 0.00364 | NIST SRM610 | 0.975 | 110 | 10 | 6 | 1000 | 15 | 0.96 |
| Proteus | Dataset 1 | Session 5 | 34.06603 | 6.45279 | 0.71886 | 0.00396 | NIST SRM610 | 0.975 | 110 | 10 | 6 | 1000 | 15 | 0.96 |
| Proteus | Dataset 1 | Session 5 | 35.95692 | 1.95443 | 0.72031 | 0.00447 | NIST SRM610 | 0.975 | 110 | 10 | 6 | 1000 | 15 | 0.96 |
| Proteus | Dataset 1 | Session 5 | 21.34836 | 2.06099 | 0.71408 | 0.00143 | NIST SRM610 | 0.975 | 110 | 10 | 6 | 1000 | 15 | 0.96 |
| Proteus | Dataset 1 | Session 5 | 20.57103 | 4.42397 | 0.71473 | 0.00208 | NIST SRM610 | 0.975 | 110 | 10 | 6 | 1000 | 15 | 0.96 |
| Proteus | Dataset 2 | Session 8 | 16.26935 | 1.30745 | 0.71288 | 0.00390 | NIST SRM610 | 1.004 | 110 | 10 | 6 | 1000 | 15 | 0.88 |
| Proteus | Dataset 2 | Session 8 | 20.55539 | 0.47724 | 0.71684 | 0.00455 | NIST SRM610 | 1.004 | 110 | 10 | 6 | 1000 | 15 | 0.88 |
| Proteus | Dataset 2 | Session 8 | 8.70702  | 0.44140 | 0.71122 | 0.00174 | NIST SRM610 | 1.004 | 110 | 10 | 6 | 1000 | 15 | 0.88 |
| Proteus | Dataset 2 | Session 8 | 46.60302 | 2.37411 | 0.72567 | 0.00458 | NIST SRM610 | 1.004 | 110 | 10 | 6 | 1000 | 15 | 0.88 |
| Proteus | Dataset 2 | Session 8 | 16.24428 | 5.05001 | 0.71166 | 0.00269 | NIST SRM610 | 1.004 | 110 | 10 | 6 | 1000 | 15 | 0.88 |
| Proteus | Dataset 2 | Session 8 | 11.04462 | 1.49118 | 0.70845 | 0.00310 | NIST SRM610 | 1.004 | 110 | 10 | 6 | 1000 | 15 | 0.88 |
| Proteus | Dataset 2 | Session 8 | 27.10883 | 1.31502 | 0.71671 | 0.00302 | NIST SRM610 | 1.004 | 110 | 10 | 6 | 1000 | 15 | 0.88 |
| Proteus | Dataset 2 | Session 8 | 2.40925  | 0.26808 | 0.70705 | 0.00145 | NIST SRM610 | 1.004 | 110 | 10 | 6 | 1000 | 15 | 0.88 |
| Proteus | Dataset 2 | Session 8 | 23.71469 | 2.79076 | 0.71646 | 0.00438 | NIST SRM610 | 1.004 | 110 | 10 | 6 | 1000 | 15 | 0.88 |
| Proteus | Dataset 2 | Session 8 | 8.21743  | 1.31180 | 0.70902 | 0.00187 | NIST SRM610 | 1.004 | 110 | 10 | 6 | 1000 | 15 | 0.88 |
| Proteus | Dataset 2 | Session 8 | 14.72453 | 0.81724 | 0.71445 | 0.00594 | NIST SRM610 | 1.004 | 110 | 10 | 6 | 1000 | 15 | 0.88 |
| Proteus | Dataset 2 | Session 8 | 22.14007 | 1.26992 | 0.71391 | 0.00528 | NIST SRM610 | 1.004 | 110 | 10 | 6 | 1000 | 15 | 0.88 |
| Proteus | Dataset 2 | Session 8 | 0.00214  | 0.00017 | 0.70602 | 0.00012 | NIST SRM610 | 1.004 | 110 | 10 | 6 | 1000 | 15 | 0.88 |
| Proteus | Dataset 2 | Session 8 | 0.00531  | 0.00106 | 0.70590 | 0.00016 | NIST SRM610 | 1.004 | 110 | 10 | 6 | 1000 | 15 | 0.88 |
| Proteus | Dataset 2 | Session 8 | 0.00581  | 0.00094 | 0.70615 | 0.00014 | NIST SRM610 | 1.004 | 110 | 10 | 6 | 1000 | 15 | 0.88 |
| Proteus | Dataset 2 | Session 9 | 0.00557  | 0.00817 | 0.70593 | 0.00014 | NIST SRM610 | 1.004 | 110 | 10 | 6 | 1000 | 15 | 0.88 |
| Proteus | Dataset 2 | Session 9 | 0.00183  | 0.00022 | 0.70584 | 0.00018 | NIST SRM610 | 1.004 | 110 | 10 | 6 | 1000 | 15 | 0.88 |
| Proteus | Dataset 2 | Session 9 | 0.00247  | 0.00043 | 0.70586 | 0.00026 | NIST SRM610 | 1.004 | 110 | 10 | 6 | 1000 | 15 | 0.88 |
| Proteus | Dataset 2 | Session 9 | 7.93930  | 0.60471 | 0.70830 | 0.00204 | NIST SRM610 | 1.004 | 110 | 10 | 6 | 1000 | 15 | 0.88 |
| Proteus | Dataset 2 | Session 9 | 8.96427  | 1.81720 | 0.71147 | 0.00355 | NIST SRM610 | 1.004 | 110 | 10 | 6 | 1000 | 15 | 0.88 |
| Proteus | Dataset 2 | Session 9 | 19.81565 | 4.20669 | 0.71010 | 0.00188 | NIST SRM610 | 1.004 | 110 | 10 | 6 | 1000 | 15 | 0.88 |
| Proteus | Dataset 2 | Session 9 | 13.36569 | 1.09600 | 0.71234 | 0.00423 | NIST SRM610 | 1.004 | 110 | 10 | 6 | 1000 | 15 | 0.88 |
| Proteus | Dataset 2 | Session 9 | 25.95962 | 0.99601 | 0.71919 | 0.00367 | NIST SRM610 | 1.004 | 110 | 10 | 6 | 1000 | 15 | 0.88 |
| Proteus | Dataset 2 | Session 9 | 25.75013 | 0.81488 | 0.71608 | 0.00411 | NIST SRM610 | 1.004 | 110 | 10 | 6 | 1000 | 15 | 0.88 |
| Proteus | Dataset 2 | Session 9 | 44.28187 | 5.54018 | 0.72025 | 0.00344 | NIST SRM610 | 1.004 | 110 | 10 | 6 | 1000 | 15 | 0.88 |
| Proteus | Dataset 2 | Session 9 | 59.52842 | 3.60668 | 0.72571 | 0.00318 | NIST SRM610 | 1.004 | 110 | 10 | 6 | 1000 | 15 | 0.88 |
| Proteus | Dataset 2 | Session 9 | 11.61055 | 1.71203 | 0.71409 | 0.00310 | NIST SRM610 | 1.004 | 110 | 10 | 6 | 1000 | 15 | 0.88 |
| Proteus | Dataset 2 | Session 9 | 13.87937 | 1.05353 | 0.71500 | 0.00318 | NIST SRM610 | 1.004 | 110 | 10 | 6 | 1000 | 15 | 0.88 |
| Proteus | Dataset 2 | Session 9 | 5.93777  | 0.32606 | 0.70784 | 0.00103 | NIST SRM610 | 1.004 | 110 | 10 | 6 | 1000 | 15 | 0.88 |
| Proteus | Dataset 2 | Session 9 | 25.99595 | 1.04803 | 0.71684 | 0.00625 | NIST SRM610 | 1.004 | 110 | 10 | 6 | 1000 | 15 | 0.88 |
| Proteus | Dataset 2 | Session 9 | 10.16950 | 1.33978 | 0.70902 | 0.00298 | NIST SRM610 | 1.004 | 110 | 10 | 6 | 1000 | 15 | 0.88 |
| Proteus | Dataset 2 | Session 9 | 17.05506 | 1.91312 | 0.71172 | 0.00322 | NIST SRM610 | 1.004 | 110 | 10 | 6 | 1000 | 15 | 0.88 |
| Proteus | Dataset 2 | Session 9 | 5.40702  | 1.08759 | 0.70720 | 0.00089 | NIST SRM610 | 1.004 | 110 | 10 | 6 | 1000 | 15 | 0.88 |
| Proteus | Dataset 2 | Session 9 | 14.59579 | 2.57847 | 0.70907 | 0.00305 | NIST SRM610 | 1.004 | 110 | 10 | 6 | 1000 | 15 | 0.88 |
| Proteus | Dataset 2 | Session 9 | 10.49606 | 1.11673 | 0.71014 | 0.00271 | NIST SRM610 | 1.004 | 110 | 10 | 6 | 1000 | 15 | 0.88 |
| Proteus | Dataset 2 | Session 9 | 17.00827 | 1.26158 | 0.71535 | 0.00379 | NIST SRM610 | 1.004 | 110 | 10 | 6 | 1000 | 15 | 0.88 |
| Proteus | Dataset 2 | Session 9 | 22.49656 | 0.53456 | 0.71620 | 0.00331 | NIST SRM610 | 1.004 | 110 | 10 | 6 | 1000 | 15 | 0.88 |
| Proteus | Dataset 2 | Session 9 | 17.28909 | 0.98571 | 0.71320 | 0.00367 | NIST SRM610 | 1.004 | 110 | 10 | 6 | 1000 | 15 | 0.88 |
| Proteus | Dataset 2 | Session 9 | 15.06705 | 0.72597 | 0.71240 | 0.00493 | NIST SRM610 | 1.004 | 110 | 10 | 6 | 1000 | 15 | 0.88 |

Table S5: Data plotted in Figure 8

| Instrument | Dataset   | Analysis Session | #Pb/#Sr  | 2SE     | #Sm/#Sr | 2SE     | #Sm/#Sr standard | <sup>207</sup> Pb/ <sup>208</sup> Pb correction factor | Spot diameter (µm) | Repetition rate (Hz) | Fluence (J/cm²) | Pulse count | Torch Depth (mm) | Sample gas (l/min) |
|------------|-----------|------------------|----------|---------|---------|---------|------------------|--------------------------------------------------------|--------------------|----------------------|-----------------|-------------|------------------|--------------------|
| Proteus    | Dataset 1 | Session 1        | 1.28547  | 0.01403 | 0.71447 | 0.00032 | Te-1             | 0.975                                                  | 110                | 10                   | 6               | 1000        | 15               | 0.96               |
| Proteus    | Dataset 1 | Session 1        | 1.06390  | 0.00770 | 0.71333 | 0.00028 | Te-1             | 0.975                                                  | 110                | 10                   | 6               | 1000        | 15               | 0.96               |
| Proteus    | Dataset 1 | Session 1        | 1.12358  | 0.00475 | 0.71355 | 0.00027 | Te-1             | 0.975                                                  | 110                | 10                   | 6               | 1000        | 15               | 0.96               |
| Proteus    | Dataset 1 | Session 1        | 0.08315  | 0.00629 | 0.70800 | 0.00031 | Te-1             | 0.975                                                  | 110                | 10                   | 6               | 1000        | 15               | 0.96               |
| Proteus    | Dataset 1 | Session 1        | 0.19761  | 0.01250 | 0.70921 | 0.00037 | Te-1             | 0.975                                                  | 110                | 10                   | 6               | 1000        | 15               | 0.96               |
| Proteus    | Dataset 1 | Session 1        | 1.19438  | 0.22839 | 0.71340 | 0.00028 | Te-1             | 0.975                                                  | 110                | 10                   | 6               | 1000        | 15               | 0.96               |
| Proteus    | Dataset 1 | Session 1        | 0.24085  | 0.01662 | 0.70912 | 0.00030 | Te-1             | 0.975                                                  | 110                | 10                   | 6               | 1000        | 15               | 0.96               |
| Proteus    | Dataset 1 | Session 1        | 0.97318  | 0.00824 | 0.71255 | 0.00028 | Te-1             | 0.975                                                  | 110                | 10                   | 6               | 1000        | 15               | 0.96               |
| Proteus    | Dataset 1 | Session 1        | 0.26147  | 0.01430 | 0.70864 | 0.00029 | Te-1             | 0.975                                                  | 110                | 10                   | 6               | 1000        | 15               | 0.96               |
| Proteus    | Dataset 1 | Session 1        | 2.73431  | 0.07700 | 0.72257 | 0.00053 | Te-1             | 0.975                                                  | 110                | 10                   | 6               | 1000        | 15               | 0.96               |
| Proteus    | Dataset 1 | Session 1        | 1.18084  | 0.00773 | 0.71426 | 0.00026 | Te-1             | 0.975                                                  | 110                | 10                   | 6               | 1000        | 15               | 0.96               |
| Proteus    | Dataset 1 | Session 1        | 0.06520  | 0.00219 | 0.70759 | 0.00024 | Te-1             | 0.975                                                  | 110                | 10                   | 6               | 1000        | 15               | 0.96               |
| Proteus    | Dataset 1 | Session 1        | 0.01737  | 0.00240 | 0.70749 | 0.00027 | Te-1             | 0.975                                                  | 110                | 10                   | 6               | 1000        | 15               | 0.96               |
| Proteus    | Dataset 1 | Session 1        | 0.03513  | 0.00226 | 0.70770 | 0.00026 | Te-1             | 0.975                                                  | 110                | 10                   | 6               | 1000        | 15               | 0.96               |
| Proteus    | Dataset 1 | Session 1        | 1.00827  | 0.08713 | 0.71365 | 0.00057 | Te-1             | 0.975                                                  | 110                | 10                   | 6               | 1000        | 15               | 0.96               |
| Proteus    | Dataset 1 | Session 1        | 1.08423  | 0.00564 | 0.71370 | 0.00031 | Te-1             | 0.975                                                  | 110                | 10                   | 6               | 1000        | 15               | 0.96               |
| Proteus    | Dataset 1 | Session 1        | 4.71338  | 0.11666 | 0.73394 | 0.00113 | Te-1             | 0.975                                                  | 110                | 10                   | 6               | 1000        | 15               | 0.96               |
| Proteus    | Dataset 1 | Session 1        | 0.35086  | 0.01484 | 0.70973 | 0.00026 | Te-1             | 0.975                                                  | 110                | 10                   | 6               | 1000        | 15               | 0.96               |
| Proteus    | Dataset 1 | Session 1        | 1.00176  | 0.00826 | 0.71299 | 0.00026 | Te-1             | 0.975                                                  | 110                | 10                   | 6               | 1000        | 15               | 0.96               |
| Proteus    | Dataset 1 | Session 1        | 0.23714  | 0.00920 | 0.70916 | 0.00018 | Te-1             | 0.975                                                  | 110                | 10                   | 6               | 1000        | 15               | 0.96               |
| Proteus    | Dataset 1 | Session 1        | 0.98651  | 0.11692 | 0.71293 | 0.00080 | Te-1             | 0.975                                                  | 110                | 10                   | 6               | 1000        | 15               | 0.96               |
| Proteus    | Dataset 1 | Session 1        | 0.15483  | 0.00721 | 0.70840 | 0.00029 | Te-1             | 0.975                                                  | 110                | 10                   | 6               | 1000        | 15               | 0.96               |
| Proteus    | Dataset 1 | Session 1        | 1.37638  | 0.04458 | 0.71562 | 0.00028 | Te-1             | 0.975                                                  | 110                | 10                   | 6               | 1000        | 15               | 0.96               |
| Proteus    | Dataset 1 | Session 1        | 1.11667  | 0.00754 | 0.71383 | 0.00029 | Te-1             | 0.975                                                  | 110                | 10                   | 6               | 1000        | 15               | 0.96               |
| Proteus    | Dataset 1 | Session 1        | 1.18905  | 0.04034 | 0.71417 | 0.00035 | Te-1             | 0.975                                                  | 110                | 10                   | 6               | 1000        | 15               | 0.96               |
| Proteus    | Dataset 1 | Session 1        | 0.13774  | 0.00678 | 0.70857 | 0.00021 | Te-1             | 0.975                                                  | 110                | 10                   | 6               | 1000        | 15               | 0.96               |
| Proteus    | Dataset 1 | Session 1        | 7.97920  | 0.26158 | 0.75247 | 0.00168 | Te-1             | 0.975                                                  | 110                | 10                   | 6               | 1000        | 15               | 0.96               |
| Proteus    | Dataset 1 | Session 3        | 20.92189 | 0.43014 | 0.82461 | 0.00203 | NIST SRM610      | 0.975                                                  | 110                | 10                   | 6               | 1000        | 15               | 0.96               |
| Proteus    | Dataset 1 | Session 3        | 23.22876 | 0.81770 | 0.83838 | 0.00478 | NIST SRM610      | 0.975                                                  | 110                | 10                   | 6               | 1000        | 15               | 0.96               |
| Proteus    | Dataset 1 | Session 3        | 8.97687  | 0.24742 | 0.75574 | 0.00167 | NIST SRM610      | 0.975                                                  | 110                | 10                   | 6               | 1000        | 15               | 0.96               |
| Proteus    | Dataset 1 | Session 3        | 1.10940  | 0.02172 | 0.71387 | 0.00025 | NIST SRM610      | 0.975                                                  | 110                | 10                   | 6               | 1000        | 15               | 0.96               |
| Proteus    | Dataset 1 | Session 3        | 21.42661 | 0.54666 | 0.82768 | 0.00333 | NIST SRM610      | 0.975                                                  | 110                | 10                   | 6               | 1000        | 15               | 0.96               |
| Proteus    | Dataset 1 | Session 3        | 1.16200  | 0.03949 | 0.71463 | 0.00022 | NIST SRM610      | 0.975                                                  | 110                | 10                   | 6               | 1000        | 15               | 0.96               |
| Proteus    | Dataset 1 | Session 3        | 2.34939  | 0.03471 | 0.72146 | 0.00039 | NIST SRM610      | 0.975                                                  | 110                | 10                   | 6               | 1000        | 15               | 0.96               |
| Proteus    | Dataset 1 | Session 3        |          |         |         |         |                  |                                                        |                    |                      |                 |             |                  |                    |

|         |           |           |          |         |         |         |      |       |     |    |   |      |    |      |
|---------|-----------|-----------|----------|---------|---------|---------|------|-------|-----|----|---|------|----|------|
| Proteus | Dataset 1 | Session 4 | 0.98594  | 0.01878 | 0.71281 | 0.00029 | Te-1 | 0.975 | 110 | 10 | 6 | 1000 | 15 | 0.96 |
| Proteus | Dataset 1 | Session 4 | 15.14449 | 0.68161 | 0.78892 | 0.00337 | Te-1 | 0.975 | 110 | 10 | 6 | 1000 | 15 | 0.96 |
| Proteus | Dataset 1 | Session 4 | 1.14034  | 0.00633 | 0.71416 | 0.00025 | Te-1 | 0.975 | 110 | 10 | 6 | 1000 | 15 | 0.96 |
| Proteus | Dataset 1 | Session 4 | 1.16620  | 0.00790 | 0.71377 | 0.00026 | Te-1 | 0.975 | 110 | 10 | 6 | 1000 | 15 | 0.96 |
| Proteus | Dataset 1 | Session 4 | 1.16068  | 0.00843 | 0.71384 | 0.00031 | Te-1 | 0.975 | 110 | 10 | 6 | 1000 | 15 | 0.96 |
| Proteus | Dataset 1 | Session 4 | 1.19048  | 0.01372 | 0.71418 | 0.00030 | Te-1 | 0.975 | 110 | 10 | 6 | 1000 | 15 | 0.96 |
| Proteus | Dataset 1 | Session 4 | 1.23365  | 0.01548 | 0.71429 | 0.00033 | Te-1 | 0.975 | 110 | 10 | 6 | 1000 | 15 | 0.96 |
| Proteus | Dataset 1 | Session 4 | 1.20787  | 0.00612 | 0.71440 | 0.00042 | Te-1 | 0.975 | 110 | 10 | 6 | 1000 | 15 | 0.96 |
| Proteus | Dataset 1 | Session 4 | 1.96416  | 0.01119 | 0.71884 | 0.00044 | Te-1 | 0.975 | 110 | 10 | 6 | 1000 | 15 | 0.96 |
| Proteus | Dataset 1 | Session 4 | 0.00529  | 0.00042 | 0.70769 | 0.00022 | Te-1 | 0.975 | 110 | 10 | 6 | 1000 | 15 | 0.96 |
| Proteus | Dataset 1 | Session 4 | 0.00475  | 0.00028 | 0.70743 | 0.00024 | Te-1 | 0.975 | 110 | 10 | 6 | 1000 | 15 | 0.96 |
| Proteus | Dataset 1 | Session 4 | 0.16102  | 0.03821 | 0.70824 | 0.00021 | Te-1 | 0.975 | 110 | 10 | 6 | 1000 | 15 | 0.96 |
| Proteus | Dataset 1 | Session 4 | 1.47011  | 0.04028 | 0.71603 | 0.00042 | Te-1 | 0.975 | 110 | 10 | 6 | 1000 | 15 | 0.96 |
| Proteus | Dataset 1 | Session 4 | 1.21087  | 0.04510 | 0.71439 | 0.00030 | Te-1 | 0.975 | 110 | 10 | 6 | 1000 | 15 | 0.96 |
| Proteus | Dataset 1 | Session 4 | 0.95750  | 0.01584 | 0.71269 | 0.00024 | Te-1 | 0.975 | 110 | 10 | 6 | 1000 | 15 | 0.96 |
| Proteus | Dataset 1 | Session 4 | 0.95974  | 0.01638 | 0.71291 | 0.00030 | Te-1 | 0.975 | 110 | 10 | 6 | 1000 | 15 | 0.96 |
| Proteus | Dataset 1 | Session 4 | 0.04190  | 0.00802 | 0.70773 | 0.00023 | Te-1 | 0.975 | 110 | 10 | 6 | 1000 | 15 | 0.96 |
| Proteus | Dataset 1 | Session 4 | 0.98005  | 0.00622 | 0.71334 | 0.00043 | Te-1 | 0.975 | 110 | 10 | 6 | 1000 | 15 | 0.96 |
| Proteus | Dataset 1 | Session 4 | 0.99224  | 0.01056 | 0.71346 | 0.00032 | Te-1 | 0.975 | 110 | 10 | 6 | 1000 | 15 | 0.96 |
| Proteus | Dataset 1 | Session 4 | 9.95712  | 0.31969 | 0.76469 | 0.00245 | Te-1 | 0.975 | 110 | 10 | 6 | 1000 | 15 | 0.96 |
| Proteus | Dataset 1 | Session 4 | 10.05752 | 0.31852 | 0.76134 | 0.00172 | Te-1 | 0.975 | 110 | 10 | 6 | 1000 | 15 | 0.96 |
| Proteus | Dataset 1 | Session 4 | 14.73654 | 0.44613 | 0.78841 | 0.00237 | Te-1 | 0.975 | 110 | 10 | 6 | 1000 | 15 | 0.96 |
| Proteus | Dataset 1 | Session 4 | 18.65930 | 1.06902 | 0.81199 | 0.00282 | Te-1 | 0.975 | 110 | 10 | 6 | 1000 | 15 | 0.96 |
| Proteus | Dataset 1 | Session 4 | 16.78946 | 0.44965 | 0.80164 | 0.00256 | Te-1 | 0.975 | 110 | 10 | 6 | 1000 | 15 | 0.96 |
| Proteus | Dataset 1 | Session 4 | 16.67489 | 1.98511 | 0.80098 | 0.01123 | Te-1 | 0.975 | 110 | 10 | 6 | 1000 | 15 | 0.96 |
| Proteus | Dataset 1 | Session 4 | 1.13728  | 0.03431 | 0.71417 | 0.00040 | Te-1 | 0.975 | 110 | 10 | 6 | 1000 | 15 | 0.96 |
| Proteus | Dataset 1 | Session 4 | 1.24898  | 0.07110 | 0.71413 | 0.00045 | Te-1 | 0.975 | 110 | 10 | 6 | 1000 | 15 | 0.96 |
| Proteus | Dataset 1 | Session 4 | 0.98630  | 0.00743 | 0.71269 | 0.00027 | Te-1 | 0.975 | 110 | 10 | 6 | 1000 | 15 | 0.96 |
| Proteus | Dataset 1 | Session 4 | 1.05901  | 0.01550 | 0.71349 | 0.00026 | Te-1 | 0.975 | 110 | 10 | 6 | 1000 | 15 | 0.96 |
| Proteus | Dataset 1 | Session 4 | 0.68066  | 0.01615 | 0.71126 | 0.00024 | Te-1 | 0.975 | 110 | 10 | 6 | 1000 | 15 | 0.96 |
| Proteus | Dataset 1 | Session 4 | 0.91543  | 0.01333 | 0.71259 | 0.00024 | Te-1 | 0.975 | 110 | 10 | 6 | 1000 | 15 | 0.96 |
| Proteus | Dataset 1 | Session 4 | 0.97318  | 0.00725 | 0.71311 | 0.00034 | Te-1 | 0.975 | 110 | 10 | 6 | 1000 | 15 | 0.96 |
| Proteus | Dataset 1 | Session 4 | 1.03697  | 0.01485 | 0.71328 | 0.00033 | Te-1 | 0.975 | 110 | 10 | 6 | 1000 | 15 | 0.96 |
| Proteus | Dataset 1 | Session 6 | 0.00424  | 0.00672 | 0.70793 | 0.00098 | Te-1 | 0.975 | 110 | 10 | 6 | 1000 | 15 | 0.96 |
| Proteus | Dataset 1 | Session 6 | 1.19884  | 0.02130 | 0.71383 | 0.00020 | Te-1 | 0.975 | 110 | 10 | 6 | 1000 | 15 | 0.96 |
| Proteus | Dataset 1 | Session 6 | 8.43669  | 1.3539  | 0.75393 | 0.00121 | Te-1 | 0.975 | 110 | 10 | 6 | 1000 | 15 | 0.96 |
| Proteus | Dataset 1 | Session 6 | 10.86071 | 0.51474 | 0.76629 | 0.00107 | Te-1 | 0.975 | 110 | 10 | 6 | 1000 | 15 | 0.96 |
| Proteus | Dataset 1 | Session 6 | 9.57641  | 0.64479 | 0.75764 | 0.00254 | Te-1 | 0.975 | 110 | 10 | 6 | 1000 | 15 | 0.96 |
| Proteus | Dataset 1 | Session 6 | 0.68462  | 0.07650 | 0.71173 | 0.00059 | Te-1 | 0.975 | 110 | 10 | 6 | 1000 | 15 | 0.96 |
| Proteus | Dataset 1 | Session 6 | 1.00310  | 0.07472 | 0.71345 | 0.00050 | Te-1 | 0.975 | 110 | 10 | 6 | 1000 | 15 | 0.96 |
| Proteus | Dataset 1 | Session 6 | 8.23441  | 0.07474 | 0.75383 | 0.00125 | Te-1 | 0.975 | 110 | 10 | 6 | 1000 | 15 | 0.96 |
| Proteus | Dataset 1 | Session 6 | 6.87374  | 0.12722 | 0.74544 | 0.00109 | Te-1 | 0.975 | 110 | 10 | 6 | 1000 | 15 | 0.96 |
| Proteus | Dataset 1 | Session 6 | 0.07038  | 0.01383 | 0.70785 | 0.00023 | Te-1 | 0.975 | 110 | 10 | 6 | 1000 | 15 | 0.96 |
| Proteus | Dataset 1 | Session 6 | 1.64408  | 0.05432 | 0.71619 | 0.00048 | Te-1 | 0.975 | 110 | 10 | 6 | 1000 | 15 | 0.96 |
| Proteus | Dataset 1 | Session 6 | 1.54760  | 0.02730 | 0.71570 | 0.00045 | Te-1 | 0.975 | 110 | 10 | 6 | 1000 | 15 | 0.96 |
| Proteus | Dataset 1 | Session 6 | 3.91588  | 0.65926 | 0.72840 | 0.00358 | Te-1 | 0.975 | 110 | 10 | 6 | 1000 | 15 | 0.96 |
| Proteus | Dataset 1 | Session 6 | 7.35305  | 0.89360 | 0.74540 | 0.00496 | Te-1 | 0.975 | 110 | 10 | 6 | 1000 | 15 | 0.96 |
| Proteus | Dataset 1 | Session 6 | 3.72164  | 0.88030 | 0.72786 | 0.00456 | Te-1 | 0.975 | 110 | 10 | 6 | 1000 | 15 | 0.96 |
| Proteus | Dataset 1 | Session 6 | 0.02132  | 0.00947 | 0.70768 | 0.00022 | Te-1 | 0.975 | 110 | 10 | 6 | 1000 | 15 | 0.96 |
| Proteus | Dataset 1 | Session 6 | 0.78771  | 0.05766 | 0.71200 | 0.00033 | Te-1 | 0.975 | 110 | 10 | 6 | 1000 | 15 | 0.96 |
| Proteus | Dataset 1 | Session 6 | 9.57131  | 0.23285 | 0.76093 | 0.00127 | Te-1 | 0.975 | 110 | 10 | 6 | 1000 | 15 | 0.96 |
| Proteus | Dataset 1 | Session 6 | 9.98999  | 0.05722 | 0.76388 | 0.00100 | Te-1 | 0.975 | 110 | 10 | 6 | 1000 | 15 | 0.96 |
| Proteus | Dataset 1 | Session 6 | 9.19705  | 0.13941 | 0.75927 | 0.00116 | Te-1 | 0.975 | 110 | 10 | 6 | 1000 | 15 | 0.96 |
| Proteus | Dataset 2 | Session 7 | 12.25440 | 0.42020 | 0.77446 | 0.00239 | Te-1 | 1.004 | 110 | 10 | 6 | 1000 | 15 | 0.88 |
| Proteus | Dataset 2 | Session 7 | 10.41401 | 0.24236 | 0.76569 | 0.00178 | Te-1 | 1.004 | 110 | 10 | 6 | 1000 | 15 | 0.88 |
| Proteus | Dataset 2 | Session 7 | 19.06979 | 0.27809 | 0.81630 | 0.00213 | Te-1 | 1.004 | 110 | 10 | 6 | 1000 | 15 | 0.88 |
| Proteus | Dataset 2 | Session 7 | 0.02316  | 0.00220 | 0.70776 | 0.00020 | Te-1 | 1.004 | 110 | 10 | 6 | 1000 | 15 | 0.88 |
| Proteus | Dataset 2 | Session 7 | 14.35027 | 0.54270 | 0.78556 | 0.00364 | Te-1 | 1.004 | 110 | 10 | 6 | 1000 | 15 | 0.88 |
| Proteus | Dataset 2 | Session 7 | 14.65207 | 0.37638 | 0.78699 | 0.00227 | Te-1 | 1.004 | 110 | 10 | 6 | 1000 | 15 | 0.88 |
| Proteus | Dataset 2 | Session 7 | 24.44625 | 0.53388 | 0.84595 | 0.00362 | Te-1 | 1.004 | 110 | 10 | 6 | 1000 | 15 | 0.88 |
| Proteus | Dataset 2 | Session 7 | 0.01157  | 0.00182 | 0.70766 | 0.00017 | Te-1 | 1.004 | 110 | 10 | 6 | 1000 | 15 | 0.88 |
| Proteus | Dataset 2 | Session 7 | 16.65294 | 0.14250 | 0.79920 | 0.00174 | Te-1 | 1.004 | 110 | 10 | 6 | 1000 | 15 | 0.88 |
| Proteus | Dataset 2 | Session 7 | 13.16263 | 0.20333 | 0.78027 | 0.00182 | Te-1 | 1.004 | 110 | 10 | 6 | 1000 | 15 | 0.88 |
| Proteus | Dataset 2 | Session 7 | 12.99420 | 0.25092 | 0.77854 | 0.00156 | Te-1 | 1.004 | 110 | 10 | 6 | 1000 | 15 | 0.88 |
| Proteus | Dataset 2 | Session 7 | 0.06173  | 0.01258 | 0.70800 | 0.00021 | Te-1 | 1.004 | 110 | 10 | 6 | 1000 | 15 | 0.88 |
| Proteus | Dataset 2 | Session 7 | 0.05220  | 0.00607 | 0.70790 | 0.00017 | Te-1 | 1.004 | 110 | 10 | 6 | 1000 | 15 | 0.88 |
| Proteus | Dataset 2 | Session 7 | 15.65855 | 0.40791 | 0.79203 | 0.00241 | Te-1 | 1.004 | 110 | 10 | 6 | 1000 | 15 | 0.88 |
| Proteus | Dataset 2 | Session 7 | 19.67463 | 1.82055 | 0.81394 | 0.00883 | Te-1 | 1.004 | 110 | 10 | 6 | 1000 | 15 | 0.88 |
| Proteus | Dataset 2 | Session 7 | 1.19376  | 0.29811 | 0.71473 | 0.00170 | Te-1 | 1.004 | 110 | 10 | 6 | 1000 | 15 | 0.88 |
| Proteus | Dataset 2 | Session 7 | 7.90576  | 1.29048 | 0.75128 | 0.00702 | Te-1 | 1.004 | 110 | 10 | 6 | 1000 | 15 | 0.88 |
| Proteus | Dataset 2 | Session 7 | 14.65674 | 0.91592 | 0.78898 | 0.00537 | Te-1 | 1.004 | 110 | 10 | 6 | 1000 | 15 | 0.88 |
| Proteus | Dataset 2 | Session 7 | 14.71433 | 0.33830 | 0.78688 | 0.00192 | Te-1 | 1.004 | 110 | 10 | 6 | 1000 | 15 | 0.88 |
| Proteus | Dataset 2 | Session 7 | 15.82324 | 0.41451 | 0.79526 | 0.00209 | Te-1 | 1.004 | 110 | 10 | 6 | 1000 | 15 | 0.88 |
| Proteus | Dataset 2 | Session 7 | 10.59951 | 0.09478 | 0.76796 | 0.00111 | Te-1 | 1.004 | 110 | 10 | 6 | 1000 | 15 | 0.88 |
| Proteus | Dataset 2 | Session 7 | 0.03430  | 0.00265 | 0.70791 | 0.00019 | Te-1 | 1.004 | 110 | 10 | 6 | 1000 | 15 | 0.88 |
| Proteus | Dataset 2 | Session 7 | 15.34158 | 0.48584 | 0.79205 | 0.00257 | Te-1 | 1.004 | 110 | 10 | 6 | 1000 | 15 | 0.88 |
| Proteus | Dataset 2 | Session 7 | 15.15010 | 0.38096 | 0.79491 | 0.00245 | Te-1 | 1.004 | 110 | 10 | 6 | 1000 | 15 | 0.88 |
| Proteus | Dataset 2 | Session 7 | 13.07742 | 0.21001 | 0.78162 | 0.00146 | Te-1 | 1.004 | 110 | 10 | 6 | 1000 | 15 | 0.88 |
| Proteus | Dataset 2 | Session 7 | 13.19819 | 0.34017 | 0.78087 | 0.00255 | Te-1 | 1.004 | 110 | 10 | 6 | 1000 | 15 | 0.88 |
| Proteus | Dataset 2 | Session 7 | 14.10176 | 0.31880 | 0.78743 | 0.00199 | Te-1 | 1.004 | 110 | 10 | 6 | 1000 | 15 | 0.88 |
| Proteus | Dataset 2 | Session 7 | 50.59332 | 1.52786 | 0.98232 | 0.00903 | Te-1 | 1.004 | 110 | 10 | 6 | 1000 | 15 | 0.88 |
| Proteus | Dataset 2 | Session 7 | 14.57826 | 0.43216 | 0.78922 | 0.00211 | Te-1 | 1.004 | 110 | 10 | 6 | 1000 | 15 | 0.88 |
| Proteus | Dataset 2 | Session 7 | 13.45997 | 0.10530 | 0.78329 | 0.00151 | Te-1 | 1.004 | 110 | 10 | 6 | 1000 | 15 | 0.88 |
| Proteus | Dataset 2 | Session 7 | 29.84395 | 0.43880 | 0.87642 | 0.00312 | Te-1 | 1.004 | 110 | 10 | 6 | 1000 | 15 | 0.88 |
| Proteus | Dataset 2 | Session 7 | 0.03097  | 0.00230 | 0.70763 | 0.00015 | Te-1 | 1.004 | 110 | 10 | 6 | 1000 | 15 | 0.88 |
| Proteus | Dataset 2 | Session 7 | 0.20285  | 0.24807 | 0.70808 | 0.00027 | Te-1 | 1.004 | 110 | 10 | 6 | 1000 | 15 | 0.88 |
| Proteus | Dataset 2 | Session 7 | 9.43717  | 0.37396 | 0.75917 | 0.00155 | Te-1 | 1.004 | 110 | 10 | 6 | 1000 | 15 | 0.88 |
| Proteus | Dataset 2 | Session 7 | 7.59909  | 0.11717 |         |         |      |       |     |    |   |      |    |      |

|         |           |           |          |         |         |         |             |       |     |    |   |      |    |      |
|---------|-----------|-----------|----------|---------|---------|---------|-------------|-------|-----|----|---|------|----|------|
| Proteus | Dataset 2 | Session 8 | 20.88267 | 3.67677 | 0.81807 | 0.01908 | NIST SRM610 | 1.004 | 110 | 10 | 6 | 1000 | 15 | 0.88 |
| Proteus | Dataset 2 | Session 8 | 10.36104 | 0.08891 | 0.76696 | 0.00125 | NIST SRM610 | 1.004 | 110 | 10 | 6 | 1000 | 15 | 0.88 |
| Proteus | Dataset 2 | Session 8 | 5.41176  | 0.06107 | 0.73713 | 0.00068 | NIST SRM610 | 1.004 | 110 | 10 | 6 | 1000 | 15 | 0.88 |
| Proteus | Dataset 2 | Session 8 | 9.57329  | 0.08965 | 0.76074 | 0.00135 | NIST SRM610 | 1.004 | 110 | 10 | 6 | 1000 | 15 | 0.88 |
| Proteus | Dataset 2 | Session 8 | 15.43379 | 0.46400 | 0.79465 | 0.00276 | NIST SRM610 | 1.004 | 110 | 10 | 6 | 1000 | 15 | 0.88 |
| Proteus | Dataset 2 | Session 8 | 0.03064  | 0.00178 | 0.70751 | 0.00020 | NIST SRM610 | 1.004 | 110 | 10 | 6 | 1000 | 15 | 0.88 |
| Proteus | Dataset 2 | Session 8 | 0.00845  | 0.00035 | 0.70774 | 0.00020 | NIST SRM610 | 1.004 | 110 | 10 | 6 | 1000 | 15 | 0.88 |
| Proteus | Dataset 2 | Session 8 | 5.83113  | 0.16146 | 0.73967 | 0.00092 | NIST SRM610 | 1.004 | 110 | 10 | 6 | 1000 | 15 | 0.88 |
| Proteus | Dataset 2 | Session 8 | 5.44109  | 0.27420 | 0.73691 | 0.00157 | NIST SRM610 | 1.004 | 110 | 10 | 6 | 1000 | 15 | 0.88 |
| Proteus | Dataset 2 | Session 8 | 5.48588  | 0.09614 | 0.73727 | 0.00064 | NIST SRM610 | 1.004 | 110 | 10 | 6 | 1000 | 15 | 0.88 |
| Proteus | Dataset 2 | Session 8 | 8.12010  | 0.25778 | 0.75319 | 0.00133 | NIST SRM610 | 1.004 | 110 | 10 | 6 | 1000 | 15 | 0.88 |
| Proteus | Dataset 2 | Session 8 | 9.66814  | 0.28359 | 0.76505 | 0.00199 | NIST SRM610 | 1.004 | 110 | 10 | 6 | 1000 | 15 | 0.88 |
| Proteus | Dataset 2 | Session 8 | 10.21998 | 0.22321 | 0.76564 | 0.00139 | NIST SRM610 | 1.004 | 110 | 10 | 6 | 1000 | 15 | 0.88 |
| Proteus | Dataset 2 | Session 8 | 12.86544 | 2.95568 | 0.77823 | 0.01632 | NIST SRM610 | 1.004 | 110 | 10 | 6 | 1000 | 15 | 0.88 |
| Proteus | Dataset 2 | Session 8 | 0.01217  | 0.00155 | 0.70776 | 0.00018 | NIST SRM610 | 1.004 | 110 | 10 | 6 | 1000 | 15 | 0.88 |
| Proteus | Dataset 2 | Session 8 | 20.24154 | 0.76035 | 0.82332 | 0.00593 | NIST SRM610 | 1.004 | 110 | 10 | 6 | 1000 | 15 | 0.88 |
| Proteus | Dataset 2 | Session 8 | 12.15832 | 0.14176 | 0.77618 | 0.00145 | NIST SRM610 | 1.004 | 110 | 10 | 6 | 1000 | 15 | 0.88 |
| Proteus | Dataset 2 | Session 8 | 11.93297 | 0.22669 | 0.77600 | 0.00181 | NIST SRM610 | 1.004 | 110 | 10 | 6 | 1000 | 15 | 0.88 |
| Proteus | Dataset 2 | Session 8 | 6.87810  | 0.17843 | 0.74603 | 0.00114 | NIST SRM610 | 1.004 | 110 | 10 | 6 | 1000 | 15 | 0.88 |
| Proteus | Dataset 2 | Session 8 | 7.19831  | 0.09473 | 0.74734 | 0.00100 | NIST SRM610 | 1.004 | 110 | 10 | 6 | 1000 | 15 | 0.88 |
| Proteus | Dataset 2 | Session 8 | 6.88190  | 0.08962 | 0.74587 | 0.00115 | NIST SRM610 | 1.004 | 110 | 10 | 6 | 1000 | 15 | 0.88 |
| Proteus | Dataset 2 | Session 8 | 3.22428  | 0.09666 | 0.72541 | 0.00047 | NIST SRM610 | 1.004 | 110 | 10 | 6 | 1000 | 15 | 0.88 |
| Proteus | Dataset 2 | Session 8 | 23.51009 | 0.50208 | 0.83945 | 0.00373 | NIST SRM610 | 1.004 | 110 | 10 | 6 | 1000 | 15 | 0.88 |
| Proteus | Dataset 2 | Session 8 | 11.10810 | 0.26458 | 0.76944 | 0.00144 | NIST SRM610 | 1.004 | 110 | 10 | 6 | 1000 | 15 | 0.88 |
| Proteus | Dataset 2 | Session 8 | 9.59438  | 0.15479 | 0.76057 | 0.00117 | NIST SRM610 | 1.004 | 110 | 10 | 6 | 1000 | 15 | 0.88 |
| Proteus | Dataset 2 | Session 8 | 4.40712  | 1.81238 | 0.72942 | 0.00896 | NIST SRM610 | 1.004 | 110 | 10 | 6 | 1000 | 15 | 0.88 |
| Proteus | Dataset 2 | Session 8 | 16.01077 | 0.52761 | 0.80048 | 0.00331 | NIST SRM610 | 1.004 | 110 | 10 | 6 | 1000 | 15 | 0.88 |
| Proteus | Dataset 2 | Session 8 | 19.29528 | 0.20432 | 0.81697 | 0.00234 | NIST SRM610 | 1.004 | 110 | 10 | 6 | 1000 | 15 | 0.88 |
| Proteus | Dataset 2 | Session 8 | 12.87663 | 0.28792 | 0.77908 | 0.00219 | NIST SRM610 | 1.004 | 110 | 10 | 6 | 1000 | 15 | 0.88 |
| Proteus | Dataset 2 | Session 8 | 7.83403  | 1.46222 | 0.75029 | 0.00134 | NIST SRM610 | 1.004 | 110 | 10 | 6 | 1000 | 15 | 0.88 |
| Proteus | Dataset 2 | Session 8 | 0.02312  | 0.00137 | 0.70829 | 0.00029 | NIST SRM610 | 1.004 | 110 | 10 | 6 | 1000 | 15 | 0.88 |
| Proteus | Dataset 2 | Session 8 | 0.19692  | 0.00734 | 0.70920 | 0.00034 | NIST SRM610 | 1.004 | 110 | 10 | 6 | 1000 | 15 | 0.88 |
| Proteus | Dataset 2 | Session 8 | 1.59167  | 0.02902 | 0.71671 | 0.00030 | NIST SRM610 | 1.004 | 110 | 10 | 6 | 1000 | 15 | 0.88 |
| Proteus | Dataset 2 | Session 8 | 1.23151  | 0.00751 | 0.71466 | 0.00035 | NIST SRM610 | 1.004 | 110 | 10 | 6 | 1000 | 15 | 0.88 |
| Proteus | Dataset 2 | Session 8 | 1.27070  | 0.27636 | 0.71445 | 0.00033 | NIST SRM610 | 1.004 | 110 | 10 | 6 | 1000 | 15 | 0.88 |
| Proteus | Dataset 2 | Session 8 | 0.83871  | 0.05030 | 0.75189 | 0.00095 | NIST SRM610 | 1.004 | 110 | 10 | 6 | 1000 | 15 | 0.88 |
| Proteus | Dataset 2 | Session 8 | 0.01329  | 0.00083 | 0.70787 | 0.00023 | NIST SRM610 | 1.004 | 110 | 10 | 6 | 1000 | 15 | 0.88 |
| Proteus | Dataset 2 | Session 8 | 0.01083  | 0.00070 | 0.70767 | 0.00026 | NIST SRM610 | 1.004 | 110 | 10 | 6 | 1000 | 15 | 0.88 |
| Proteus | Dataset 2 | Session 8 | 0.01139  | 0.00064 | 0.70783 | 0.00033 | NIST SRM610 | 1.004 | 110 | 10 | 6 | 1000 | 15 | 0.88 |
| Proteus | Dataset 2 | Session 8 | 1.36560  | 0.01272 | 0.71518 | 0.00028 | NIST SRM610 | 1.004 | 110 | 10 | 6 | 1000 | 15 | 0.88 |
| Proteus | Dataset 2 | Session 8 | 1.44178  | 0.02159 | 0.71527 | 0.00033 | NIST SRM610 | 1.004 | 110 | 10 | 6 | 1000 | 15 | 0.88 |
| Proteus | Dataset 2 | Session 8 | 1.53336  | 0.07056 | 0.71637 | 0.00046 | NIST SRM610 | 1.004 | 110 | 10 | 6 | 1000 | 15 | 0.88 |
| Proteus | Dataset 2 | Session 8 | 3.08251  | 0.07056 | 0.72456 | 0.00055 | NIST SRM610 | 1.004 | 110 | 10 | 6 | 1000 | 15 | 0.88 |
| Proteus | Dataset 2 | Session 8 | 2.54136  | 0.09262 | 0.72153 | 0.00081 | NIST SRM610 | 1.004 | 110 | 10 | 6 | 1000 | 15 | 0.88 |
| Proteus | Dataset 2 | Session 8 | 0.04812  | 0.01236 | 0.70769 | 0.00023 | NIST SRM610 | 1.004 | 110 | 10 | 6 | 1000 | 15 | 0.88 |
| Proteus | Dataset 2 | Session 8 | 0.07809  | 0.00395 | 0.70796 | 0.00024 | NIST SRM610 | 1.004 | 110 | 10 | 6 | 1000 | 15 | 0.88 |
| Proteus | Dataset 2 | Session 8 | 2.07743  | 0.03306 | 0.71927 | 0.00035 | NIST SRM610 | 1.004 | 110 | 10 | 6 | 1000 | 15 | 0.88 |
| Proteus | Dataset 2 | Session 8 | 2.03093  | 0.01948 | 0.71886 | 0.00042 | NIST SRM610 | 1.004 | 110 | 10 | 6 | 1000 | 15 | 0.88 |
| Proteus | Dataset 2 | Session 9 | 0.22782  | 0.00810 | 0.70846 | 0.00031 | NIST SRM610 | 1.004 | 110 | 10 | 6 | 1000 | 15 | 0.88 |
| Proteus | Dataset 2 | Session 9 | 5.06633  | 0.08758 | 0.73629 | 0.00071 | NIST SRM610 | 1.004 | 110 | 10 | 6 | 1000 | 15 | 0.88 |
| Proteus | Dataset 2 | Session 9 | 18.09159 | 0.39456 | 0.80783 | 0.00215 | NIST SRM610 | 1.004 | 110 | 10 | 6 | 1000 | 15 | 0.88 |
| Proteus | Dataset 2 | Session 9 | 16.13870 | 0.31369 | 0.79792 | 0.00199 | NIST SRM610 | 1.004 | 110 | 10 | 6 | 1000 | 15 | 0.88 |
| Proteus | Dataset 2 | Session 9 | 4.33791  | 0.14481 | 0.73235 | 0.00077 | NIST SRM610 | 1.004 | 110 | 10 | 6 | 1000 | 15 | 0.88 |
| Proteus | Dataset 2 | Session 9 | 0.23114  | 0.00828 | 0.70841 | 0.00024 | NIST SRM610 | 1.004 | 110 | 10 | 6 | 1000 | 15 | 0.88 |
| Proteus | Dataset 2 | Session 9 | 6.20434  | 0.28213 | 0.74193 | 0.00119 | NIST SRM610 | 1.004 | 110 | 10 | 6 | 1000 | 15 | 0.88 |
| Proteus | Dataset 2 | Session 9 | 38.63894 | 1.55862 | 0.92094 | 0.01077 | NIST SRM610 | 1.004 | 110 | 10 | 6 | 1000 | 15 | 0.88 |
| Proteus | Dataset 2 | Session 9 | 20.76549 | 2.66465 | 0.81768 | 0.01208 | NIST SRM610 | 1.004 | 110 | 10 | 6 | 1000 | 15 | 0.88 |
| Proteus | Dataset 2 | Session 9 | 4.69366  | 0.38557 | 0.73694 | 0.00385 | NIST SRM610 | 1.004 | 110 | 10 | 6 | 1000 | 15 | 0.88 |
| Proteus | Dataset 2 | Session 9 | 3.95376  | 0.08458 | 0.72958 | 0.00078 | NIST SRM610 | 1.004 | 110 | 10 | 6 | 1000 | 15 | 0.88 |
| Proteus | Dataset 2 | Session 9 | 5.56189  | 0.09923 | 0.73820 | 0.00078 | NIST SRM610 | 1.004 | 110 | 10 | 6 | 1000 | 15 | 0.88 |
| Proteus | Dataset 2 | Session 9 | 22.12513 | 0.30370 | 0.83007 | 0.00215 | NIST SRM610 | 1.004 | 110 | 10 | 6 | 1000 | 15 | 0.88 |
| Proteus | Dataset 2 | Session 9 | 14.17053 | 0.26544 | 0.78499 | 0.00176 | NIST SRM610 | 1.004 | 110 | 10 | 6 | 1000 | 15 | 0.88 |
| Proteus | Dataset 2 | Session 9 | 20.61915 | 3.26884 | 0.82534 | 0.01967 | NIST SRM610 | 1.004 | 110 | 10 | 6 | 1000 | 15 | 0.88 |
| Proteus | Dataset 2 | Session 9 | 7.16655  | 0.09323 | 0.74724 | 0.00108 | NIST SRM610 | 1.004 | 110 | 10 | 6 | 1000 | 15 | 0.88 |
| Proteus | Dataset 2 | Session 9 | 6.20859  | 0.13770 | 0.74153 | 0.00090 | NIST SRM610 | 1.004 | 110 | 10 | 6 | 1000 | 15 | 0.88 |
| Proteus | Dataset 2 | Session 9 | 5.69107  | 0.11614 | 0.73854 | 0.00071 | NIST SRM610 | 1.004 | 110 | 10 | 6 | 1000 | 15 | 0.88 |

Table S6: Data plotted in Figure 10 & sample ion yield calculated for Agilent 8800 from 2 million counts per second of <sup>88</sup>Sr reported for NIST SRM610 with 49% Sr to SrF conversion efficiency when using SF<sub>6</sub> reaction gas (Hogmalm et al., 2017).

| Instrument   | Sample ion yield (%) | <sup>88</sup> Sr/ <sup>86</sup> Sr ± 2SE | Spot diameter (μm) | Repetition rate (Hz) | Fluence (J/cm <sup>2</sup> ) | Pulse count |
|--------------|----------------------|------------------------------------------|--------------------|----------------------|------------------------------|-------------|
| Proteus      | 0.05                 | 0.00035                                  | 110                | 10                   | 6                            | 600         |
| Proteus      | 0.05                 | 0.00046                                  | 110                | 10                   | 6                            | 600         |
| Proteus      | 0.05                 | 0.00033                                  | 110                | 10                   | 6                            | 600         |
| Proteus      | 0.05                 | 0.00030                                  | 110                | 10                   | 6                            | 600         |
| Proteus      | 0.05                 | 0.00028                                  | 110                | 10                   | 6                            | 600         |
| Proteus      | 0.05                 | 0.00038                                  | 110                | 10                   | 6                            | 600         |
| iCAP-TQ      | 0.0003               | 0.0087                                   | 110                | 10                   | 6                            | 600         |
| iCAP-TQ      | 0.0003               | 0.0086                                   | 110                | 10                   | 6                            | 600         |
| iCAP-TQ      | 0.0004               | 0.0089                                   | 110                | 10                   | 6                            | 600         |
| iCAP-TQ      | 0.0004               | 0.0085                                   | 110                | 10                   | 6                            | 600         |
| iCAP-TQ      | 0.0004               | 0.0084                                   | 110                | 10                   | 6                            | 600         |
| iCAP-TQ      | 0.0003               | 0.0087                                   | 110                | 10                   | 6                            | 600         |
| Agilent 8800 | 0.006                |                                          | 50                 | 10                   | 7                            |             |

Table S7: Data plotted in Figure 11

| Instrument | Dataset   | Analysis Session | <sup>86</sup> Rb/ <sup>87</sup> Sr | 2SE     | <sup>87</sup> Sr/ <sup>86</sup> Sr | 2SE     | <sup>87</sup> Sr/ <sup>86</sup> Sr standard | <sup>86</sup> Rb/ <sup>87</sup> Sr correction factor | Spot diameter (μm) | Repetition rate (Hz) | Fluence (J/cm <sup>2</sup> ) | Laser pulse count | Torch Depth (mm) | Sample gas (l/min) |
|------------|-----------|------------------|------------------------------------|---------|------------------------------------|---------|---------------------------------------------|------------------------------------------------------|--------------------|----------------------|------------------------------|-------------------|------------------|--------------------|
| Proteus    | Dataset 3 | Session 8        | 0.15647                            | 0.05867 | 0.71036                            | 0.00059 | NIST SRM610                                 | 0.997                                                | 110                | 10                   | 6                            | 600               | 15               | 0.88               |
| Proteus    | Dataset 3 | Session 8        | 0.05982                            | 0.00459 | 0.70962                            | 0.00064 | NIST SRM610                                 | 0.997                                                | 110                | 10                   | 6                            | 600               | 15               | 0.88               |
| Proteus    | Dataset 3 | Session 8        | 0.06199                            | 0.01124 | 0.70898                            | 0.00073 | NIST SRM610                                 | 0.997                                                | 110                | 10                   | 6                            | 600               | 15               | 0.88               |
| Proteus    | Dataset 3 | Session 8        | 0.03179                            | 0.00106 | 0.70986                            | 0.00060 | NIST SRM610                                 | 0.997                                                | 110                | 10                   | 6                            | 600               | 15               | 0.88               |
| Proteus    | Dataset 3 | Session 8        | 20.27922                           | 0.51534 | 0.79195                            | 0.00314 | NIST SRM610                                 | 0.997                                                | 110                | 10                   | 6                            | 600               | 15               | 0.88               |
| Proteus    | Dataset 3 | Session 8        | 25.87102                           | 0.51662 | 0.81381                            | 0.00262 | NIST SRM610                                 | 0.997                                                | 110                | 10                   | 6                            | 600               | 15               | 0.88               |
| Proteus    | Dataset 3 | Session 8        | 22.77867                           | 0.40329 | 0.79909                            | 0.00227 | NIST SRM610                                 | 0.997                                                | 110                | 10                   | 6                            | 600               | 15               | 0.88               |
| Proteus    | Dataset 3 | Session 8        | 11.09805                           | 0.21022 | 0.75228                            | 0.00189 | NIST SRM610                                 | 0.997                                                | 110                | 10                   | 6                            | 600               | 15               | 0.88               |
| Proteus    | Dataset 3 | Session 8        | 23.40030                           | 0.25162 | 0.80181                            | 0.00261 | NIST SRM610                                 | 0.997                                                | 110                | 10                   | 6                            | 600               | 15               | 0.88               |
| Proteus    | Dataset 3 | Session 8        | 26.01956                           | 0.52616 | 0.81564                            | 0.00423 | NIST SRM610                                 | 0.997                                                | 110                | 10                   | 6                            | 600</             |                  |                    |

Table S8: Age resolution model outputs (Fig.12 & 13)

| <sup>87</sup> Rb/ <sup>87</sup> Sr range | Age (Ma) | Proteus       |               | 8800 QQQ      | (CAP-TQ)      |
|------------------------------------------|----------|---------------|---------------|---------------|---------------|
|                                          |          | (2σ % of age) | (2σ % of age) | (2σ % of age) | (2σ % of age) |
| 0-1                                      | 20       | 140.19        | 497.06        | 1254.33       |               |
| 0-1                                      | 40       | 70.10         | 248.54        | 627.16        |               |
| 0-1                                      | 60       | 46.74         | 165.70        | 418.10        |               |
| 0-1                                      | 80       | 35.06         | 124.28        | 313.57        |               |
| 0-1                                      | 100      | 28.05         | 99.43         | 250.86        |               |
| 0-1                                      | 120      | 23.39         | 82.86         | 209.04        |               |
| 0-1                                      | 140      | 20.05         | 71.03         | 179.18        |               |
| 0-1                                      | 160      | 17.55         | 62.15         | 156.78        |               |
| 0-1                                      | 180      | 15.61         | 55.25         | 139.36        |               |
| 0-1                                      | 200      | 14.06         | 49.73         | 125.42        |               |
| 0-1                                      | 300      | 9.40          | 33.17         | 83.61         |               |
| 0-1                                      | 400      | 7.08          | 24.89         | 62.71         |               |
| 0-1                                      | 500      | 5.70          | 19.93         | 50.17         |               |
| 0-1                                      | 600      | 4.78          | 16.63         | 41.81         |               |
| 0-1                                      | 700      | 4.13          | 14.27         | 35.84         |               |
| 0-1                                      | 800      | 3.65          | 12.50         | 31.36         |               |
| 0-1                                      | 900      | 3.28          | 11.13         | 27.88         |               |
| 0-1                                      | 1000     | 2.98          | 10.03         | 25.09         |               |
| 0-1                                      | 1100     | 2.74          | 9.13          | 22.82         |               |
| 0-1                                      | 1200     | 2.55          | 8.39          | 20.92         |               |
| 0-1                                      | 1300     | 2.38          | 7.76          | 19.31         |               |
| 0-1                                      | 1400     | 2.24          | 7.22          | 17.94         |               |
| 0-1                                      | 1500     | 2.12          | 6.76          | 16.74         |               |
| 0-1                                      | 1600     | 2.01          | 6.35          | 15.70         |               |
| 0-1                                      | 1700     | 1.92          | 5.99          | 14.78         |               |
| 0-1                                      | 1800     | 1.84          | 5.67          | 13.96         |               |
| 0-1                                      | 1900     | 1.77          | 5.39          | 13.23         |               |
| 0-1                                      | 2000     | 1.71          | 5.14          | 12.57         |               |
| 0-1                                      | 3000     | 1.32          | 3.54          | 8.41          |               |
| 0-1                                      | 4000     | 1.14          | 2.77          | 6.35          |               |
| 0-3                                      | 20       | 46.71         | 165.67        | 417.91        |               |
| 0-3                                      | 40       | 23.38         | 82.87         | 209.01        |               |
| 0-3                                      | 60       | 15.61         | 55.27         | 139.38        |               |
| 0-3                                      | 80       | 11.73         | 41.48         | 104.56        |               |
| 0-3                                      | 100      | 9.41          | 33.20         | 83.67         |               |
| 0-3                                      | 120      | 7.86          | 27.68         | 69.74         |               |
| 0-3                                      | 140      | 6.76          | 23.75         | 59.80         |               |
| 0-3                                      | 160      | 5.94          | 20.79         | 52.34         |               |
| 0-3                                      | 180      | 5.30          | 18.50         | 46.54         |               |
| 0-3                                      | 200      | 4.79          | 16.66         | 41.90         |               |
| 0-3                                      | 300      | 3.29          | 11.17         | 27.98         |               |
| 0-3                                      | 400      | 2.56          | 8.43          | 21.02         |               |
| 0-3                                      | 500      | 2.13          | 6.80          | 16.85         |               |
| 0-3                                      | 600      | 1.85          | 5.72          | 14.07         |               |
| 0-3                                      | 700      | 1.66          | 4.95          | 12.09         |               |
| 0-3                                      | 800      | 1.52          | 4.38          | 10.60         |               |
| 0-3                                      | 900      | 1.41          | 3.94          | 9.45          |               |
| 0-3                                      | 1000     | 1.33          | 3.59          | 8.52          |               |
| 0-3                                      | 1100     | 1.26          | 3.30          | 7.77          |               |
| 0-3                                      | 1200     | 1.21          | 3.07          | 7.14          |               |
| 0-3                                      | 1300     | 1.16          | 2.87          | 6.61          |               |
| 0-3                                      | 1400     | 1.13          | 2.70          | 6.16          |               |
| 0-3                                      | 1500     | 1.09          | 2.56          | 5.77          |               |
| 0-3                                      | 1600     | 1.06          | 2.43          | 5.43          |               |
| 0-3                                      | 1700     | 1.04          | 2.33          | 5.12          |               |
| 0-3                                      | 1800     | 1.02          | 2.23          | 4.86          |               |
| 0-3                                      | 1900     | 1.00          | 2.14          | 4.62          |               |
| 0-3                                      | 2000     | 0.98          | 2.07          | 4.40          |               |
| 0-3                                      | 3000     | 0.88          | 1.59          | 3.06          |               |
| 0-3                                      | 4000     | 0.83          | 1.36          | 2.41          |               |
| 0-30                                     | 20       | 4.80          | 3.48          | 8.74          |               |
| 0-30                                     | 40       | 2.56          | 3.30          | 8.23          |               |
| 0-30                                     | 60       | 1.86          | 3.09          | 7.60          |               |
| 0-30                                     | 80       | 1.52          | 2.88          | 6.98          |               |
| 0-30                                     | 100      | 1.34          | 2.70          | 6.42          |               |
| 0-30                                     | 120      | 1.21          | 2.54          | 5.92          |               |
| 0-30                                     | 140      | 1.13          | 2.41          | 5.50          |               |
| 0-30                                     | 160      | 1.07          | 2.30          | 5.12          |               |
| 0-30                                     | 180      | 1.02          | 2.20          | 4.80          |               |
| 0-30                                     | 200      | 0.99          | 2.11          | 4.52          |               |
| 0-30                                     | 300      | 0.88          | 1.83          | 3.54          |               |
| 0-30                                     | 400      | 0.83          | 1.66          | 2.96          |               |
| 0-30                                     | 500      | 0.80          | 1.55          | 2.59          |               |
| 0-30                                     | 600      | 0.78          | 1.47          | 2.33          |               |
| 0-30                                     | 700      | 0.77          | 1.41          | 2.15          |               |
| 0-30                                     | 800      | 0.76          | 1.36          | 2.00          |               |
| 0-30                                     | 900      | 0.75          | 1.33          | 1.89          |               |
| 0-30                                     | 1000     | 0.75          | 1.29          | 1.80          |               |
| 0-30                                     | 1100     | 0.74          | 1.27          | 1.73          |               |
| 0-30                                     | 1200     | 0.74          | 1.24          | 1.66          |               |
| 0-30                                     | 1300     | 0.73          | 1.22          | 1.61          |               |
| 0-30                                     | 1400     | 0.73          | 1.21          | 1.57          |               |
| 0-30                                     | 1500     | 0.73          | 1.19          | 1.53          |               |
| 0-30                                     | 1600     | 0.73          | 1.18          | 1.49          |               |
| 0-30                                     | 1700     | 0.73          | 1.17          | 1.46          |               |
| 0-30                                     | 1800     | 0.73          | 1.15          | 1.43          |               |
| 0-30                                     | 1900     | 0.73          | 1.14          | 1.41          |               |
| 0-30                                     | 2000     | 0.72          | 1.14          | 1.39          |               |
| 0-30                                     | 3000     | 0.72          | 1.08          | 1.25          |               |
| 0-30                                     | 4000     | 0.72          | 1.05          | 1.18          |               |
| 0-300                                    | 20       | 1.54          | 3.18          | 10.52         |               |
| 0-300                                    | 40       | 1.07          | 1.84          | 5.56          |               |
| 0-300                                    | 60       | 0.94          | 1.42          | 3.91          |               |
| 0-300                                    | 80       | 0.87          | 1.23          | 3.10          |               |
| 0-300                                    | 100      | 0.84          | 1.11          | 2.62          |               |
| 0-300                                    | 120      | 0.81          | 1.04          | 2.30          |               |
| 0-300                                    | 140      | 0.80          | 0.99          | 2.08          |               |
| 0-300                                    | 160      | 0.78          | 0.95          | 1.91          |               |
| 0-300                                    | 180      | 0.77          | 0.92          | 1.78          |               |
| 0-300                                    | 200      | 0.77          | 0.90          | 1.68          |               |
| 0-300                                    | 300      | 0.74          | 0.83          | 1.37          |               |
| 0-300                                    | 400      | 0.74          | 0.80          | 1.22          |               |
| 0-300                                    | 500      | 0.73          | 0.78          | 1.13          |               |
| 0-300                                    | 600      | 0.73          | 0.76          | 1.07          |               |
| 0-300                                    | 700      | 0.72          | 0.76          | 1.03          |               |
| 0-300                                    | 800      | 0.72          | 0.75          | 1.00          |               |
| 0-300                                    | 900      | 0.72          | 0.75          | 0.96          |               |
| 0-300                                    | 1000     | 0.72          | 0.74          | 0.96          |               |
| 0-300                                    | 1100     | 0.72          | 0.74          | 0.94          |               |
| 0-300                                    | 1200     | 0.72          | 0.74          | 0.93          |               |
| 0-300                                    | 1300     | 0.72          | 0.74          | 0.91          |               |
| 0-300                                    | 1400     | 0.72          | 0.73          | 0.90          |               |
| 0-300                                    | 1500     | 0.72          | 0.73          | 0.89          |               |
| 0-300                                    | 1600     | 0.72          | 0.73          | 0.89          |               |
| 0-300                                    | 1700     | 0.72          | 0.73          | 0.88          |               |
| 0-300                                    | 1800     | 0.72          | 0.73          | 0.87          |               |
| 0-300                                    | 1900     | 0.72          | 0.73          | 0.87          |               |

|       |      |      |      |      |
|-------|------|------|------|------|
| 0-300 | 2000 | 0.72 | 0.73 | 0.86 |
| 0-300 | 3000 | 0.72 | 0.73 | 0.83 |
| 0-300 | 4000 | 0.72 | 0.72 | 0.82 |

Table S9: <sup>87</sup>Rb/<sup>86</sup>Sr and Sr concentrations used in theoretical age resolution model

| <sup>87</sup> Rb/ <sup>86</sup> Sr (0-1) | [Sr] (µg/g) | <sup>87</sup> Rb/ <sup>86</sup> Sr (0-3) | [Sr] (µg/g) | <sup>87</sup> Rb/ <sup>86</sup> Sr (0-30) | [Sr] (µg/g) | <sup>87</sup> Rb/ <sup>86</sup> Sr (0-300) | [Sr] (µg/g) |
|------------------------------------------|-------------|------------------------------------------|-------------|-------------------------------------------|-------------|--------------------------------------------|-------------|
| 0.001                                    | 500         | 0.001                                    | 500         | 0.001                                     | 500         | 0.001                                      | 500         |
| 0.1                                      | 50          | 0.3                                      | 50          | 3                                         | 50          | 30                                         | 5           |
| 0.2                                      | 50          | 0.6                                      | 50          | 6                                         | 50          | 60                                         | 5           |
| 0.3                                      | 50          | 0.9                                      | 50          | 9                                         | 50          | 90                                         | 5           |
| 0.4                                      | 50          | 1.2                                      | 50          | 12                                        | 50          | 120                                        | 5           |
| 0.5                                      | 50          | 1.5                                      | 50          | 15                                        | 50          | 150                                        | 5           |
| 0.6                                      | 50          | 1.8                                      | 50          | 18                                        | 50          | 180                                        | 5           |
| 0.7                                      | 50          | 2.1                                      | 50          | 21                                        | 50          | 210                                        | 5           |
| 0.8                                      | 50          | 2.4                                      | 50          | 24                                        | 50          | 240                                        | 5           |
| 0.9                                      | 50          | 2.7                                      | 50          | 27                                        | 50          | 270                                        | 5           |
| 1.0                                      | 50          | 3.0                                      | 50          | 30                                        | 50          | 300                                        | 5           |

Table S10: Data plotted in Figure 12

Sample: SG-1 (Single K-feldspar)

| Instrument | Dataset  | Analysis Session | <sup>87</sup> Rb/ <sup>86</sup> Sr | 2SE     | <sup>86</sup> Sr/ <sup>88</sup> Sr | 2SE     | <sup>86</sup> Sr/ <sup>88</sup> Sr standard | <sup>87</sup> Rb/ <sup>86</sup> Sr correction factor | Spot number | Spot diameter µm | Repetition rate (Hz) | Fluence (J/cm <sup>2</sup> ) | Laser pulse count | Torch Depth (mm) | Sample gas (l/min) |
|------------|----------|------------------|------------------------------------|---------|------------------------------------|---------|---------------------------------------------|------------------------------------------------------|-------------|------------------|----------------------|------------------------------|-------------------|------------------|--------------------|
| Proteus    | Dataset1 | Session 4        | 0.02871                            | 0.00550 | 0.70746                            | 0.00027 | Te-1                                        | 0.975                                                | 1           | 110              | 10                   | 6                            | 1000              | 15               | 0.86               |
| Proteus    | Dataset1 | Session 4        | 0.07044                            | 0.00626 | 0.70759                            | 0.00027 | Te-1                                        | 0.975                                                | 2           | 110              | 10                   | 6                            | 1000              | 15               | 0.96               |
| Proteus    | Dataset1 | Session 4        | 1.76785                            | 0.04877 | 0.71744                            | 0.00044 | Te-1                                        | 0.975                                                | 3           | 110              | 10                   | 6                            | 1000              | 15               | 0.96               |
| Proteus    | Dataset1 | Session 4        | 1.34318                            | 0.02837 | 0.71502                            | 0.00027 | Te-1                                        | 0.975                                                | 4           | 110              | 10                   | 6                            | 1000              | 15               | 0.96               |
| Proteus    | Dataset1 | Session 4        | 2.25158                            | 0.07591 | 0.71991                            | 0.00029 | Te-1                                        | 0.975                                                | 5           | 110              | 10                   | 6                            | 1000              | 15               | 0.96               |
| Proteus    | Dataset1 | Session 4        | 2.04773                            | 0.01768 | 0.71900                            | 0.00030 | Te-1                                        | 0.975                                                | 6           | 110              | 10                   | 6                            | 1000              | 15               | 0.96               |
| Proteus    | Dataset1 | Session 4        | 2.74740                            | 0.24095 | 0.72264                            | 0.00144 | Te-1                                        | 0.975                                                | 7           | 110              | 10                   | 6                            | 1000              | 15               | 0.96               |
| Proteus    | Dataset1 | Session 4        | 2.31938                            | 0.03766 | 0.71989                            | 0.00033 | Te-1                                        | 0.975                                                | 8           | 110              | 10                   | 6                            | 1000              | 15               | 0.96               |
| Proteus    | Dataset1 | Session 4        | 2.27023                            | 0.15827 | 0.71976                            | 0.00034 | Te-1                                        | 0.975                                                | 9           | 110              | 10                   | 6                            | 1000              | 15               | 0.96               |
| Proteus    | Dataset1 | Session 4        | 2.27715                            | 0.05809 | 0.71998                            | 0.00042 | Te-1                                        | 0.975                                                | 10          | 110              | 10                   | 6                            | 1000              | 15               | 0.96               |
| Proteus    | Dataset1 | Session 4        | 2.16379                            | 0.08985 | 0.71951                            | 0.00063 | Te-1                                        | 0.975                                                | 11          | 110              | 10                   | 6                            | 1000              | 15               | 0.96               |
| Proteus    | Dataset1 | Session 4        | 1.47772                            | 0.01955 | 0.71572                            | 0.00032 | Te-1                                        | 0.975                                                | 12          | 110              | 10                   | 6                            | 1000              | 15               | 0.96               |
| Proteus    | Dataset1 | Session 4        | 2.18168                            | 0.08321 | 0.71920                            | 0.00066 | Te-1                                        | 0.975                                                | 13          | 110              | 10                   | 6                            | 1000              | 15               | 0.96               |
| Proteus    | Dataset1 | Session 4        | 1.67326                            | 0.03224 | 0.71670                            | 0.00032 | Te-1                                        | 0.975                                                | 14          | 110              | 10                   | 6                            | 1000              | 15               | 0.96               |
| Proteus    | Dataset1 | Session 4        | 2.62185                            | 0.18741 | 0.72200                            | 0.00030 | Te-1                                        | 0.975                                                | 15          | 110              | 10                   | 6                            | 1000              | 15               | 0.96               |
| Proteus    | Dataset1 | Session 4        | 1.27674                            | 0.01760 | 0.71464                            | 0.00021 | Te-1                                        | 0.975                                                | 16          | 110              | 10                   | 6                            | 1000              | 15               | 0.96               |
| Proteus    | Dataset1 | Session 4        | 1.80464                            | 0.03216 | 0.71755                            | 0.00025 | Te-1                                        | 0.975                                                | 17          | 110              | 10                   | 6                            | 1000              | 15               | 0.96               |
| Proteus    | Dataset1 | Session 4        | 2.33983                            | 0.05687 | 0.72028                            | 0.00035 | Te-1                                        | 0.975                                                | 18          | 110              | 10                   | 6                            | 1000              | 15               | 0.96               |
| Proteus    | Dataset1 | Session 4        | 1.80669                            | 0.11292 | 0.71742                            | 0.00030 | Te-1                                        | 0.975                                                | 19          | 110              | 10                   | 6                            | 1000              | 15               | 0.96               |
| Proteus    | Dataset1 | Session 4        | 2.07649                            | 0.08256 | 0.71934                            | 0.00043 | Te-1                                        | 0.975                                                | 20          | 110              | 10                   | 6                            | 1000              | 15               | 0.96               |
| Proteus    | Dataset1 | Session 4        | 2.17952                            | 0.12909 | 0.71945                            | 0.00050 | Te-1                                        | 0.975                                                | 21          | 110              | 10                   | 6                            | 1000              | 15               | 0.96               |
| Proteus    | Dataset1 | Session 4        | 2.12129                            | 0.13577 | 0.71957                            | 0.00082 | Te-1                                        | 0.975                                                | 22          | 110              | 10                   | 6                            | 1000              | 15               | 0.96               |
| Proteus    | Dataset1 | Session 4        | 2.44123                            | 0.09530 | 0.72069                            | 0.00049 | Te-1                                        | 0.975                                                | 23          | 110              | 10                   | 6                            | 1000              | 15               | 0.96               |
| Proteus    | Dataset1 | Session 4        | 4.39818                            | 0.13376 | 0.73131                            | 0.00095 | Te-1                                        | 0.975                                                | 24          | 110              | 10                   | 6                            | 1000              | 15               | 0.96               |
| Proteus    | Dataset1 | Session 4        | 4.70285                            | 0.14042 | 0.73336                            | 0.00089 | Te-1                                        | 0.975                                                | 25          | 110              | 10                   | 6                            | 1000              | 15               | 0.96               |
| Proteus    | Dataset1 | Session 4        | 4.02226                            | 0.05838 | 0.72950                            | 0.00041 | Te-1                                        | 0.975                                                | 26          | 110              | 10                   | 6                            | 1000              | 15               | 0.96               |
| Proteus    | Dataset1 | Session 4        | 1.19154                            | 0.15343 | 0.71381                            | 0.00054 | Te-1                                        | 0.975                                                | 27          | 110              | 10                   | 6                            | 1000              | 15               | 0.96               |
| Proteus    | Dataset1 | Session 4        | 2.90751                            | 0.13242 | 0.72340                            | 0.00068 | Te-1                                        | 0.975                                                | 28          | 110              | 10                   | 6                            | 1000              | 15               | 0.96               |
| Proteus    | Dataset1 | Session 4        | 2.20928                            | 0.04172 | 0.71998                            | 0.00039 | Te-1                                        | 0.975                                                | 29          | 110              | 10                   | 6                            | 1000              | 15               | 0.96               |
| Proteus    | Dataset1 | Session 4        | 1.99519                            | 0.04374 | 0.71860                            | 0.00035 | Te-1                                        | 0.975                                                | 30          | 110              | 10                   | 6                            | 1000              | 15               | 0.96               |
| Proteus    | Dataset1 | Session 4        | 2.24122                            | 0.04268 | 0.71995                            | 0.00033 | Te-1                                        | 0.975                                                | 31          | 110              | 10                   | 6                            | 1000              | 15               | 0.96               |
| Proteus    | Dataset1 | Session 4        | 3.61710                            | 0.09764 | 0.72734                            | 0.00062 | Te-1                                        | 0.975                                                | 32          | 110              | 10                   | 6                            | 1000              | 15               | 0.96               |
| Proteus    | Dataset1 | Session 4        | 1.77040                            | 0.04321 | 0.71725                            | 0.00030 | Te-1                                        | 0.975                                                | 33          | 110              | 10                   | 6                            | 1000              | 15               | 0.96               |
| Proteus    | Dataset1 | Session 4        | 2.19415                            | 0.04389 | 0.72001                            | 0.00033 | Te-1                                        | 0.975                                                | 34          | 110              | 10                   | 6                            | 1000              | 15               | 0.96               |
| Proteus    | Dataset2 | Session 8        | 0.01071                            | 0.00071 | 0.70767                            | 0.00026 | NIST SRM610                                 | 1.004                                                | 35          | 110              | 10                   | 6                            | 1000              | 15               | 0.88               |
| Proteus    | Dataset2 | Session 8        | 1.36559                            | 0.01271 | 0.71515                            | 0.00028 | NIST SRM610                                 | 1.004                                                | 36          | 110              | 10                   | 6                            | 1000              | 15               | 0.88               |
| Proteus    | Dataset2 | Session 8        | 1.44176                            | 0.02159 | 0.71524                            | 0.00033 | NIST SRM610                                 | 1.004                                                | 37          | 110              | 10                   | 6                            | 1000              | 15               | 0.88               |
| Proteus    | Dataset2 | Session 8        | 1.53333                            | 0.07056 | 0.71636                            | 0.00047 | NIST SRM610                                 | 1.004                                                | 38          | 110              | 10                   | 6                            | 1000              | 15               | 0.88               |
| Proteus    | Dataset2 | Session 8        | 3.08282                            | 0.07061 | 0.72450                            | 0.00055 | NIST SRM610                                 | 1.004                                                | 39          | 110              | 10                   | 6                            | 1000              | 15               | 0.88               |
| Proteus    | Dataset2 | Session 8        | 2.54154                            | 0.09266 | 0.72149                            | 0.00080 | NIST SRM610                                 | 1.004                                                | 40          | 110              | 10                   | 6                            | 1000              | 15               | 0.88               |
| Proteus    | Dataset2 | Session 8        | 0.07824                            | 0.00396 | 0.70820                            | 0.00024 | NIST SRM610                                 | 1.004                                                | 41          | 110              | 10                   | 6                            | 1000              | 15               | 0.88               |
| Proteus    | Dataset2 | Session 8        | 4.13015                            | 0.27175 | 0.72846                            | 0.00130 | NIST SRM610                                 | 1.004                                                | 42          | 110              | 10                   | 6                            | 1000              | 15               | 0.88               |
| Proteus    | Dataset2 | Session 8        | 2.08437                            | 0.03316 | 0.71948                            | 0.00035 | NIST SRM610                                 | 1.004                                                | 43          | 110              | 10                   | 6                            | 1000              | 15               | 0.88               |
| Proteus    | Dataset2 | Session 8        | 2.03770                            | 0.01953 | 0.71907                            | 0.00042 | NIST SRM610                                 | 1.004                                                | 44          | 110              | 10                   | 6                            | 1000              | 15               | 0.88               |
| Proteus    | Dataset2 | Session 8        | 1.81135                            | 0.12981 | 0.71751                            | 0.00072 | NIST SRM610                                 | 1.004                                                | 45          | 110              | 10                   | 6                            | 1000              | 15               | 0.88               |
| Proteus    | Dataset2 | Session 8        | 2.23395                            | 0.05986 | 0.71995                            | 0.00049 | NIST SRM610                                 | 1.004                                                | 46          | 110              | 10                   | 6                            | 1000              | 15               | 0.88               |
| Proteus    | Dataset2 | Session 8        | 1.62988                            | 0.03198 | 0.71657                            | 0.00042 | NIST SRM610                                 | 1.004                                                | 47          | 110              | 10                   | 6                            | 1000              | 15               | 0.88               |
| Proteus    | Dataset2 | Session 8        | 2.44966                            | 0.02062 | 0.72161                            | 0.00047 | NIST SRM610                                 | 1.004                                                | 48          | 110              | 10                   | 6                            | 1000              | 15               | 0.88               |
| Proteus    | Dataset2 | Session 8        | 2.09227                            | 0.06097 | 0.71924                            | 0.00037 | NIST SRM610                                 | 1.004                                                | 49          | 110              | 10                   | 6                            | 1000              | 15               | 0.88               |
| Proteus    | Dataset2 | Session 8        | 0.66745                            | 0.03070 | 0.71148                            | 0.00037 | NIST SRM610                                 | 1.004                                                | 50          | 110              | 10                   | 6                            | 1000              | 15               | 0.88               |
| Proteus    | Dataset2 | Session 8        | 3.47617                            | 0.35374 | 0.72656                            | 0.00196 | NIST SRM610                                 | 1.004                                                | 51          | 110              | 10                   | 6                            | 1000              | 15               | 0.88               |
| Proteus    | Dataset2 | Session 8        | 2.11306                            | 0.02200 | 0.71938                            | 0.00041 | NIST SRM610                                 | 1.004                                                | 52          | 110              | 10                   | 6                            | 1000              | 15               | 0.88               |
| Proteus    | Dataset2 | Session 8        | 2.48047                            | 0.05208 | 0.72127                            | 0.00041 | NIST SRM610                                 | 1.004                                                | 53          | 110              | 10                   | 6                            | 1000              | 15               | 0.88               |
| Proteus    | Dataset2 | Session 8        | 1.54229                            | 0.01841 | 0.71664                            | 0.00034 | NIST SRM610                                 | 1.004                                                | 54          | 110              | 10                   | 6                            | 1000              | 15               | 0.88               |
| Proteus    | Dataset2 | Session 8        | 1.32541                            | 0.17834 | 0.71505                            | 0.00102 | NIST SRM610                                 | 1.004                                                | 55          | 110              | 10                   | 6                            | 1000              | 15               | 0.88               |
| Proteus    | Dataset2 | Session 8        | 2.09024                            | 0.03759 | 0.71922                            | 0.00041 | NIST SRM610                                 | 1.004                                                | 56          | 110              | 10                   | 6                            | 1000              | 15               | 0.88               |
| Proteus    | Dataset2 | Session 8        | 0.93589                            | 0.17972 | 0.71320                            | 0.00097 | NIST SRM610                                 | 1.004                                                | 57          | 110              | 10                   | 6                            | 1000              | 15               | 0.88               |
| Proteus    | Dataset2 | Session 8        | 2.37080                            | 0.07377 | 0.72113                            | 0.00051 | NIST SRM610                                 | 1.004                                                | 58          | 110              | 10                   | 6                            | 1000              | 15               | 0.88               |
| Proteus    | Dataset2 | Session 8        | 2.12413                            | 0.07771 | 0.71965                            | 0.00045 | NIST SRM610                                 | 1.004                                                | 59          | 110              | 10                   | 6                            | 1000              | 15               | 0.88               |
| Proteus    | Dataset2 | Session 8        | 1.55361                            | 0.04023 | 0.71646                            | 0.00042 | NIST SRM610                                 | 1.004                                                | 60          | 110              | 10                   | 6                            | 1000              | 15               | 0.88               |
| Proteus    | Dataset2 | Session 8        | 2.25665                            | 0.03665 | 0.72035                            | 0.00048 | NIST SRM610                                 | 1.004                                                | 61          | 110              | 10                   | 6                            | 1000              | 15               | 0.88               |
| Proteus    | Dataset2 | Session 8        | 3.68965                            | 0.08034 | 0.72874                            | 0.00075 | NIST SRM610                                 | 1.004                                                | 62          | 110              | 10                   | 6                            | 1000              | 15               | 0.88               |
| Proteus    | Dataset2 | Session 8        | 4.06941                            | 0.10791 | 0.73024                            | 0.00113 | NIST SRM610                                 | 1.004                                                | 63          | 110              | 10                   | 6                            | 1000              | 15               | 0.88               |
| Proteus    | Dataset2 | Session 8        | 1.72676                            | 0.03787 | 0.71746                            | 0.00034 | NIST SRM610                                 | 1.004                                                | 64          | 110              | 10                   | 6                            | 1000              | 15               | 0.88               |
| Proteus    | Dataset2 | Session 8        | 2.51708                            | 0.05425 | 0.72271                            | 0.00063 | NIST SRM610                                 | 1.004                                                | 65          | 110              | 10                   | 6                            | 1000              | 15               | 0.88               |
| Proteus    | Dataset2 | Session 8        | 3.18718                            | 0.05162 | 0.72535                            | 0.00069 | NIST SRM610                                 | 1.004                                                | 66          | 110              | 10                   | 6                            | 1000              | 15               | 0.88               |
| Proteus    | Dataset2 | Session 8        | 2.16186                            | 0.03601 | 0.71974                            | 0.00047 | NIST SRM610                                 | 1.004                                                | 67          | 110              | 10                   | 6                            | 1000              | 15               | 0.88               |
| Proteus    | Dataset2 | Session 8        | 3.04238                            | 0.08421 | 0.72482                            | 0.00064 | NIST SRM610                                 | 1.004                                                | 68          | 110              | 10                   | 6                            | 1000              | 15               | 0.88               |
| Proteus    | Dataset2 | Session 8        | 1.02190                            | 0.09502 | 0.71332                            | 0.00073 | NIST SRM610                                 | 1.004                                                | 69          | 110              | 10                   | 6                            | 1000              | 15               | 0.88               |
| Proteus    | Dataset2 | Session 8        | 3.20805                            | 0.28652 | 0.72568                            | 0.00173 | NIST SRM610                                 | 1.004                                                | 70          | 110              | 10                   | 6                            | 1000              | 15               | 0.88               |
